# Supplementary material for: Quantifying the role of moss in terrestrial ecosystem carbon dynamics in northern high-latitudes
Source: Copernicus journal article supplement (doi:10.5194/bg-2021-57), 2021-03-19
Supplement: Supplementary file [file bg-2021-57-AC4-supplement.pdf]

## General comments

This study updates an existing ecosystems model (TEM 5.0) to account for mosses - including moss photosynthesis and respiration, and the influence of the moss layer on soil temperature, moisture and ecosystem N dynamics. The updated model (TEM-Moss) is then used to simulate future carbon dynamics for northern high latitudes, and by comparing the TEM-Moss simulations to those from TEM 5.0, the authors aim to understand the role of mosses in determining the future carbon balance of the region.

This is an important topic – forecasting northern high latitude C dynamics is critical for understanding global change, and mosses are an important component of northern vegetation. Attempting to understand the role of mosses on such a broad scale is novel; there has been some work incorporating the thermal properties of mosses in land-surface models, but I'm not aware of any similar analyses at this scale. It's an ambitious study and in general the manuscript is well structured and logically presented.

My main criticism is around how the TEM-Model is calibrated and validated, and whether the comparison to TEM 5.0 is valid. It may be that I haven't understood the methods fully, but it seems TEM-Moss is based on ecosystem-level calibrations of the 'moss parameters', but TEM 5.0 is not based on representative ecosystem level calibrations. If this is the case, it doesn't make sense to compare the performance of the two models. It also means that the calibrated 'moss parameters' will be compensating for un-calibrated 'non-moss parameters' i.e. the optimal moss parameters for an ecosystem will likely reflect differences in the properties of the higher plant vegetation which have not been captured by the 'default' version of TEM 5.0.

In conclusion, I think the aims of the study are worthwhile, and the general approach to update TEM 5.0 is valid, but a more robust model analysis is needed.

## Specific comments

I've made line by line comments below which I hope will be helpful in revising the paper.

Line 41: Define northern high latitudes and the types of ecosystems that are included in the study.

**Response:** Thanks for your comments and suggestions. We changed the sentence to “Northern high latitude ecosystems, which refers to the land ecosystems (>45 °N) in northern temperate, boreal, grassland and tundra regions”.

Line 43. Add some text to highlight the uncertainty around the 1024 Pg figure.

**Response:** We revised the sentence as “contain as much as 1024 Pg soil organic carbon from 0 to 3 m depth”.

Line 44-47. “This large amount of carbon is potentially responsive to ongoing global warming”. The references supporting this statement are quite old, please cite some more recent literature (e.g. Burke et al., 2017, Koven et al., 2015, Comyn-Platt et al., 2018)

**Response:** Following suggestions, we updated the references.

Line 154: Please provide more detail on the function  $f(N_A)$ .

**Response:** We added “which is a scalar function that depends on monthly N available for incorporation into plant production of new tissue” to describe  $f(N_A)$ .

Line 238: “higher plants” rather than “higher vegetations”.

**Response:** We revised it.

Line 238: Did you use a single set of default parameters for the standard TEM model? I’m not sure I follow the reasoning here. Zha and Zhuang 2018 is an arctic study, yet you are using data from temperate forests and grasslands to calibrate TEM-Moss. Did you use the same set of default parameters across all sites? And did you use any other site-level information – apart from the NEP data – when calibrating the model?

**Response:** For TEM 5.0 simulations, we used different sets of default parameters for each vegetation type. Zha and Zhuang (2018) focused on the same region, but we parameterized that TEM version with site level information. In this study, we used site level data to parameterize TEM\_Moss, but use the default parameterization of TEM 5.0 to compare with TEM-Moss simulations. Site-level parameterization was conducted based NEP data in addition to site level vegetation and soil information. Some site level data of NEP were used for model validation. Additionally, soil temperature and moisture at validation sites were also evaluated.

Line 247: I don’t fully understand how the posterior parameter distributions were generated. As I understand it, the SCE algorithm provides a point-estimate for each parameter, then you treat the 50 independent point estimates as samples from a posterior parameter distribution? Is this correct? Please provide some clarification on this in the text. Please also update the legend in figure 4 – what probabilities do the boxes and tails represent?

**Response:** Yes, the posterior parameter distribution is just the distribution for the 50 independent point estimates. We added the explanation to boxes and whiskers into the figure caption “Boxes represent the range between the first quartile and the third quartile of the parameter values, the red line within box represents the second quartile or the mean of the values. The bottom and top whiskers represent minimum and maximum parameter values, respectively.”

Line 250: Zhuang 2010 is a study from the Tibetan plateau, and Zhuang 2015 is northern high latitude wetlands. How do you justify using (I assume calibrated?) parameters from these studies to model C and N dynamics at temperate forest and grassland sites?

**Response:** The correct citation is Zhuang et al. (2003).

Zhuang, Q., A. D. McGuire, J. M. Melillo, J. S. Clein, R. J. Dargaville, D. W. Kicklighter, R. B. Myneni, J. Dong, V. E. Romanovsky, J. Harden, J. E. Hobbie (2003) Carbon cycling in extratropical terrestrial ecosystems of the Northern Hemisphere during the 20th Century: A modeling analysis of the influences of soil thermal dynamics, *Tellus*, 55B, 751-776, 2003

Line 266: please explain in more detail how the six site-level calibrations for TEM-Moss are applied to the pixel by pixel simulation. Is this on the basis of vegetation class?

**Response:** Yes. We added a sentence “With six site-level calibrated parameters, TEM-Moss is applied to the region pixel by pixel based on vegetation distribution data.”.

Line 289: If I understand correctly, TEM-Moss uses calibrated parameters for the representative ecosystems, but TEM 5.0 uses a single set of default parameters. If this is the case, it is not surprising that TEM-Moss performs better than TEM 5.0 in the validation exercise.

**Response:** TEM 5.0 also used the calibrated parameters for representative ecosystems and extrapolated to the region based on the same set of data of vegetation distribution.

Line 359: The number for RH for TEM 5.0 is not correct, and the figure reference should be figure 11b.

**Response:** We corrected the number. But the figure is figure 11a.

Line 412-414: These figures for the moss percentage contribution to NPP seem very high. 20 % of NPP may be realistic for boreal forest (note the Turetsky study is 20% of aboveground NPP, which is probably < 10 % of total NPP) but your study covers the entire northern latitudes from 45oN. Is a moss contribution of >25 % of 21st century NPP really plausible? I would want to see a much more thorough discussion of this, with references to observed data from a wider range of representative ecosystems.

**Response:** Thanks for the comments. Yes, Turetsky et al. (2010) suggested an average contribution of 20% of aboveground NPP from moss in boreal forests. Frolking et al. (1996) even reported a contribution of 38.4% to total NPP by moss at a boreal forest site. These estimates are for the historical periods and our estimates of 17.6% of NPP in the 20th century is at the lower end of their estimates. Our estimates of 28.8% and 27.6% in the 21st century under the RCP 2.6 410 and RCP 8.5 scenarios, respectively, are still similar to the range of existing estimates for the historical period.

Turetsky et al. (2010) conducted a long-term data analysis through literature synthesis, representing a good knowledge about moss contribution to both wetlands and upland ecosystems in Alaska. They found that mosses contributed 48% and 20% of wetland and upland productivity, respectively. In this revision, we revised the sentence to “This is comparable with the results reported by a synthesis study, indicating an average contribution of 20% of aboveground NPP from moss in upland boreal forests and the contribution is 48% in wetlands ecosystems.”

Line 440: Changing vegetation is a key limitation, I recommend adding some more discussion here on the likely changes in moss abundance as climate warms, e.g. with respect to changing temperature/ hydrology/ shading by vascular plants.

**Response:** Thanks for the suggestion. We added a few references to explicitly discuss the potential the impacts of moss distribution and abundance on carbon budget in the region. In this revision, we also added the following to further discuss the impacts of vegetation including mosses on carbon dynamics in the region. “A long-term warming experiments along natural climatic gradients, ranging from Swedish subarctic birch forest and subarctic/subalpine tundra to

Alaskan arctic tussock tundra concluded that both diversity and abundance of mosses are likely to decrease under arctic climate warming (Long et al. 2012). Similarly, total moss cover declined in both heath and mesic meadow under experimental long-term warming (by 1.5–3 °C), driven by general declines in many species (Alatalo et al., 2020). Due to global warming, significant losses in moss diversity are expected in boreal forests and alpine biomes, leading to changes in ecosystem structure and function, nutrient cycling, and carbon balance (He et al., 2015). “

# Quantifying the role of moss in terrestrial ecosystem carbon dynamics in northern high-latitudes

Junrong Zha and Qianlai Zhuang

Department of Earth, Atmospheric, and Planetary Sciences and Department of Agronomy,  
Purdue University, West Lafayette, IN 47907, USA

Correspondence: Qianlai Zhuang ([qzhuang@purdue.edu](mailto:qzhuang@purdue.edu))

To be submitted to: *Journal of Biogeoscience*

**Key words:** moss, carbon dynamics, Earth System Modeling, terrestrial ecosystems, Arctic

## Abstract

In addition to woody and herbaceous plants, mosses are ubiquitous in northern terrestrial ecosystems, which play an important role in regional carbon, water and energy cycling.

Current global land surface models ~~that which do not without~~ considering moss may bias the quantification of the regional carbon dynamics. Here we incorporate moss into a process-based biogeochemistry model, the Terrestrial Ecosystem Model (TEM 5.0), as a new plant functional type to develop a new model (TEM\_Moss). The new model explicitly quantifies the interactions between ~~higher-plant~~vascular plants and mosses and their competition for energy, water, and nutrients. Compared to the estimates using TEM 5.0, the new model estimates that the regional terrestrial soils store 132.7 Pg more C at present day, and will store 157.5 Pg and 179.1 Pg more C under the RCP 8.5 and RCP 2.6 scenarios, respectively, by the end of the 21<sup>st</sup> century. Ensemble regional simulations forced with different parameters for the 21<sup>st</sup> century with TEM\_Moss predict that the region will accumulate  $161.1 \pm 142.1$  Pg C under the RCP 2.6 scenario, and  $186.7 \pm 166.1$  Pg C under the RCP 8.5 scenario over the century. Our study highlights the necessity of coupling moss into Earth System Models to adequately quantify terrestrial carbon-climate feedbacks in the Arctic.

40

## 41 1. Introduction

42 Northern high latitude ecosystems, which refers to the land ecosystems (>45 °N) in  
43 northern temperate, boreal, grassland and tundra regions, hold~~occupy~~ about 30% of global  
44 terrestrial carbon (C) in soils and plants (Allison and Treseder, 2008; Jobbágy and Jackson,  
45 2000; Kasischke, 2000; Tarnocai et al., 2009; Hugelius et al., 2014), and contain as much as  
46 1024 Pg soil organic carbon from 0 to 3 m depth (Treseder et al., 2016; Schuur et al., 2008).  
47 This large amount of carbon is potentially responsive to ongoing global warming (Burke et al.,  
48 2017, Koven et al., 2015, Comyn-Platt et al., 2018)~~McGuire et al., 1995; Melillo et al., 1993;~~  
49 ~~McGuire and Hobbie, 1997~~), which is especially pronounced at high latitudes (Treseder et al.,  
50 2016; IPCC, 2014). Thus, explicit investigation of carbon-climate feedback is important (Wieder  
51 et al., 2013; Bond-Lamberty and Thomson, 2010).

52 Ecosystem models are important tools for understanding the role of boreal ecosystems in  
53 carbon-climate feedbacks (Bond-Lamberty et al., 2005; Chadburn et al., 2017; Zhuang et al.,  
54 2002; Treseder et al., 2016). Process-based biogeochemical models such as TEM (Hayes et al.,  
55 2014; Raich et al., 1991; Melillo et al., 1993; McGuire et al., 1992; Zhuang et al., 2001, 2002,  
56 2010, 2013), Biome-BGC (Running and Coughlan, 1988; Bond-Lamberty et al., 2007), and  
57 Biosphere Energy Transfer Hydrology scheme (BETHY) (Knorr, 2000) are increasingly  
58 employed to simulate current and future carbon dynamics. Those models estimate carbon  
59 dynamics by simulating processes such as photosynthesis, respiration, nitrogen competition,  
60 evapotranspiration and soil decomposition (Bond-Lamberty et al., 2005; Zhuang et al., 2015).  
61 The results from these models are influenced by components and processes that are built into the  
62 model (Turetsky et al., 2012; Oreskes et al., 1994). However, the role~~whether~~ of boreal forests

~~act in (as a~~ carbon sink or source) activities ~~has~~<sup>ve</sup> not yet reached a consensus due to a number of model limitations (Cahoon et al., 2012; Hayes et al., 2011; Todd-Brown et al., 2013).

One limitation is that ecosystems models often ignore some important components such as understory processes that play crucial roles in biogeochemical cycles (Zhuang et al., 2002; Treseder et al., 2011; Bond-Lamberty et al., 2005). For instance, mosses are ubiquitous in northern ecosystems, and show a pattern of increasing abundance with increasing latitude (Turetsky et al., 2012; Jägerbrand et al., 2006). Their functional traits, including tolerance to drought and a broad response of net assimilation rates to temperature, allow them to persist in high-latitude regions (Kallio and Heinonen, 1975; Harley et al., 1989). The activities of moss that are related to water, nutrients, and energy may influence several ecosystem processes such as permafrost formation and thaw, peat accumulation, soil decomposition and net primary productivity (NPP) (Turetsky et al., 2012; Nilsson and Wardle, 2005). Mosses can have positive or negative interactions with vascular plants (Skre and Oechel, 1979; Turetsky et al., 2010). On the one hand, mosses compete with vascular plants for available nutrients, negatively affecting vascular plants productivity (Skre and Oechel, 1979; Gornall et al., 2011; Turetsky et al., 2012). Besides, a thick moss cover can form an environment with water logging or low oxygen supply, which is common in high-latitude regions (Skre and Oechel, 1979; Cornelissen et al., 2007). The moss cover prevents absorbed solar heat from being conducted down into the soil, and tends to decrease soil temperature in summer. Therefore, soil decomposition rates can be affected since they are mediated by soil temperature, which will further influence growth of vascular plants (Gornall et al., 2007). On the other hand, some species of mosses can serve as an important source of nitrogen because of their associations with microbial nitrogen fixers ~~because of their ability of facilitating biological nitrogen fixation and their low nitrogen-use efficiency~~ (Basilier,



1979; DeLuca et al., 2007; Markham, 2009; Kip et al., 2011). Thus, mosses can also exert positive effects on plant growth due to their regulation ~~of~~ nitrogen availability for vascular plants (Hobbie et al., 2000; Gornall et al., 2007). It is gradually being recognized that mosses can have comparable influences on high-latitude ecosystems to vascular plants, due to their large density and essential function in plant competition, soil climate, and carbon and nutrient cycling (Longton, 1988; Lindo and Gonzalez, 2010; Okland, 1995; Pharo and Zartman, 2007). They can on average contribute 20% of aboveground NPP in boreal forests (Turetsky et al., 2010), and their annual NPP may reach as high as 350 g C m<sup>-2</sup> in some regions in the Arctic (Pakarinen and Vitt 1973), even exceeding that of vascular plants (Oechel and Collins, 1976; Clarke et al., 1971). Thus, ignorance of mosses, the keystone species of boreal ecosystems, can pose large biases in model predictions and limit the utility of models. To date, a number of ecosystem models have already included moss activities to explore the response of moss to disturbance (Bond-Lamberty et al., 2007; Euskirchen et al., 2009; Frolking et al., 2010, Wania et al., 2009, Chadburn et al., 2015, Porada et al., 2016, Druel et al., 2017), or improve model prediction of carbon dynamics (Bond-Lamberty et al., 2005). However, the potential role of moss in the regional carbon dynamics in northern high latitudes has been slowly evaluated by considering the interactions between moss and ~~higher plant~~vascular plants, especially with respect to their competition for water, nutrient and energy.

This study developed a new version of Terrestrial Ecosystem Model (Raich et al., 1991; McGuire et al., 1992; Zhuang et al., 2001, 2002, 2010, 2013, 2015), hereafter referred to as TEM\_Moss, by explicitly considering moss impacts on terrestrial ecosystem carbon dynamics. The ~~interactions and~~ competition of water, energy and nutrient between ~~higher plant~~vascular plants and mosses are explicitly modeled. The verified TEM\_Moss and previous TEM were compared

against the observed data of ecosystem carbon, soil temperature and moisture dynamics. Both models were then used to analyze the regional carbon dynamics in northern high latitudes (north of 45 °N) during the 20<sup>th</sup> and 21<sup>st</sup> centuries.

## 2. Methods

### 2.1 Overview

First, we briefly describe how we developed the TEM\_Moss by modifying the previous TEM 5.0 to consider their interactions between ~~higher-plant~~vascular plants and mosses. Second, parameterization and validation of TEM\_Moss using measured gap-filled carbon flux data and meteorological data at representative sites is presented. Third, we present how we have applied both models (TEM\_Moss and TEM 5.0) to the northern high latitudes (above 45 °N) to quantify regional carbon dynamics during the 20<sup>th</sup> and 21<sup>st</sup> centuries.

### 2.2 Model description

TEM is a process-based, large-scale biogeochemical model that uses monthly climatic data and spatially explicit vegetation and soil information to simulate the dynamics of carbon and nitrogen fluxes and pool sizes of plants and soils (Raich et al., 1991; McGuire et al., 1992; Zhuang et al., 2010, 2015, 2020). However, in previous versions of TEM, the interactions between mosses and ~~higher-plant~~vascular plants on carbon and nitrogen cycling have not been included. Here we developed a TEM\_Moss model by modifying model structure and incorporating activities of moss into extant TEM 5.0 (Zhuang et al., 2003). Based on the structure of TEM 5.0, we added carbon and nitrogen pools and fluxes to simulate activities of moss including photosynthesis, respiration, litterfall and nutrient and water cycling (Figure 1). Thus, the structure of TEM\_Moss includes the processes of both ~~higher-plant~~vascular plants and mosses (Figure 1).

In TEM\_Moss, moss photosynthesis ( $f_i$ ) is described as a maximum rate, reduced by influence of photosynthetically active radiation, mean air temperature, mean atmospheric carbon dioxide concentrations, moss moisture, and indirectly, nitrogen availability (Frolking et al., 1996; Launiainen et al., 2015; Zhuang et al., 2002). For each time step,  $f_i$  is calculated as:

$$f_i = C_{\max} \cdot f_{\text{PAR}} \cdot f_T \cdot f_N \cdot f_M \quad (1)$$

where  $C_{\max}$  denotes the maximum rate of carbon assimilation by moss (units:  $\text{gC m}^{-2}\text{mon}^{-1}$ ),

$f_{\text{PAR}}$  is a scalar function that depends on monthly photosynthetically active radiation (PAR), which is calculated as (Frolking et al., 1996; Launiainen et al., 2015; Kulmala et al., 2011):

$$f_{\text{PAR}} = \frac{\text{PAR}}{\text{PAR} + b} \quad (2)$$

where  $b$  (units:  $\mu\text{mol m}^{-2} \text{s}^{-1}$ ) is the half saturation constant for PAR use by moss as indicated by the Michaelis–Menten kinetic.

The temperature effect on moss photosynthesis is modeled as a multiplier (Frolking et al., 1996; Raich et al., 1991):

$$f_T = \frac{(T - T_{\min})(T_{\max} - T_{\text{opt}})}{(T_{\max} - T_{\min})(T - T_{\text{opt}})} \quad (3)$$

where  $T$  is the monthly mean air temperature (units:  $^{\circ}\text{C}$ ), and  $T_{\min}$ ,  $T_{\max}$ , and  $T_{\text{opt}}$  are parameters (units:  $^{\circ}\text{C}$ ) that limit  $f_T$  to a range of zero to one.

The moisture effect is also modeled as a multiplier (Frolking et al., 1996; Raich et al., 1991):

$$f_M = \frac{M}{M + 3} \quad (4)$$

where  $w_m$  is moss moisture (units: mm), and  $w_{min}$ ,  $w_{max}$ , and  $w_{opt}$  are related parameters (units: mm) that limit  $h(w_m)$  to a range of zero to one.

$h([CO_2])$  is also a scalar function that depends on monthly mean atmospheric carbon dioxide concentration (Zhuang et al., 2002; Raich et al., 1991):

$$h([CO_2]) = \frac{[CO_2] - k_m}{[CO_2] + k_m} \quad (5)$$

where  $[CO_2]$  (units:  $\mu L/L$ ) represents monthly mean atmospheric carbon dioxide concentration, the  $k_m$  (units:  $\mu L/L$ ) is the internal  $CO_2$  concentration at which moss C assimilation proceeds at one-half its maximum rate.

The function  $h(NA)$  models the limiting effects of plant nitrogen status on GPP (McGuire et al., 1992; Zhuang et al., 2002), which ~~is a unitless multiplier.~~ is a scalar function that depends on monthly N available for incorporation into plant production of new tissue.

Meanwhile, in TEM\_Moss, we defined the moss respiration rate ( $R_m$ ) as a function of moss respiration rate at 10 °C, moss respiration temperature sensitivity which was expressed as a  $Q_{10}$  function, and moss moisture (Launiainen et al., 2015; Frolking et al., 1996):

$$R_m = R_{10} \cdot Q_{10}^{\frac{T_m - 10}{10}} \cdot h(w_m) \quad (6)$$

where  $R_{10}$  (units:  $gC\ m^{-2}mon^{-1}$ ) represents the moss respiration rate at 10 °C, the parameter  $Q_{10}$  is moss respiration temperature sensitivity,  $T_m$  is moss temperature (°C) and  $w_m$  is moss moisture (mm).

The function  $h(w_m)$  denotes the moisture effect on moss respiration. Here we used  $h(w_m)$  to distinguish with the function  $h([CO_2])$ , which is moisture effect on moss

170 photosynthesis as mentioned earlier.  $\theta^3$  is defined as (Frolking et al., 1996; Zhuang et al,  
171 2002):

$$172 \quad \theta^3 = \frac{\theta - \theta_{min}}{\theta_{opt} - \theta_{min}} \quad (7)$$

173 where  $\theta^3$  (units: mm) denotes the optimal water content for moss respiration.

174 Besides, the carbon in litter production from mosses to soil ( $\dot{Z}$ ) is modeled as  
175 proportional to moss carbon biomass with a constant ratio (Zhuang et al., 2002):

$$176 \quad \dot{Z} = c_{fall_m} \cdot MOSSC \quad (8)$$

177 where MOSSC denotes the moss carbon biomass, and  $c_{fall_m}$  is the corresponding constant  
178 proportion.

179 Thus, the change of moss carbon pool (MOSSC) can be modeled as:

$$180 \quad \frac{d(MOSSC)}{dt} = GPP_m - \dot{Z} \quad (9)$$

181 On the other hand, researches have shown that mosses can uptake substantial inorganic  
182 nitrogen from the bulk soil (Ayres et al., 2006, Fritz et al., 2014). In our model, nitrogen uptake  
183 by moss ( $N_{uptake_m}$ ) is modelled as a function of available soil nitrogen, moss moisture, and  
184 mean air temperature, and the relative amount of energy allocated to N versus C uptake (Zhuang  
185 et al., 2002; Raich et al., 1991):

$$186 \quad N_{uptake_m} = N_{max} \cdot \theta^{\alpha} \cdot \frac{N_{av}}{N_{av} + K_N} \quad (10)$$

187 Where  $N_{max}$  is the maximum rate of nitrogen uptake by mosses (units:  $gC\ m^{-2}mon^{-1}$ ), and  $N_{av}$   
188 (units:  $g\ m^{-2}$ ) represents available soil nitrogen, which is treated as a state variable in our model.

189  $S$  (units:  $\text{g m}^{-2}$ ) is the concentration of available soil nitrogen at which nitrogen uptake proceeds  
 190 at one-half its maximum rate.  $T$  is the monthly mean air temperature ( $^{\circ}\text{C}$ ), and  $A_m$  is a unitless  
 191 parameter ranging from 0 to 1, which represents relative allocation of effort to carbon vs.  
 192 nitrogen uptake.  $K_s$  is a parameter accounting for relative differences in the conductance of the  
 193 soil to N diffusion, which can be calculated through moss moisture (Zhuang et al., 2002; Raich et  
 194 al., 1991):

$$195 \quad \check{Z} = \frac{w_f}{K_s} \quad (11)$$

196 where  $w_f$  (units: mm) denotes the moss field capacity.

197 The nitrogen in litter production from mosses to soil ( $\check{Z}$ ) is modeled as proportional to  
 198 moss nitrogen biomass with a constant ratio (Zhuang et al., 2002):

$$199 \quad \check{Z} = n_{\text{fall}_m} \cdot \text{MOSSN} \quad (12)$$

200 where  $n_{\text{fall}_m}$  is the constant proportion to moss nitrogen biomass (MOSSN).

201 Thus, the changes in moss nitrogen pool (MOSSN) can be modeled as:

$$202 \quad \frac{d(\text{MOSSN})}{dt} = \check{Z} - \text{MOSSN} \cdot \mu \quad (13)$$

203 At the same time, total carbon and nitrogen in litterfall, and total nitrogen uptake from  
 204 soil available nitrogen are changed due to incorporation of mosses:

$$205 \quad \check{Z} = \mu \cdot \text{MOSSN} \quad (14)$$

$$206 \quad \check{Z} = \mu \cdot \text{MOSSN} \quad (15)$$

$$207 \quad \mu = \mu_0 + \mu_1 \cdot \text{MOSSN} \quad (16)$$

208 Where  $\dot{C}$  and  $\dot{N}$  are carbon and nitrogen in litter production from ~~higher plant~~vascular  
 209 plants to soil, and  $\dot{C}_s$  and  $\dot{N}_s$  are nitrogen uptake by ~~higher plant~~vascular plants (Raich et al., 1991;  
 210 Melillo et al., 1993; Zhuang et al., 2003).

211 Except above equations, other governing equations in TEM 5.0 have not been changed.  
 212 More equations of TEM 5.0 have been documented in previous studies (Raich et al., 1991;  
 213 McGuire et al., 1992; Zhuang et al., 2003; Zha and Zhuang, 2018).

214 In TEM 5.0, a soil thermal module (STM) simulates soil thermal dynamics considering  
 215 the effects of moss thickness, soil moisture, and snowpack (Zhuang et al., 2001, 2002). In STM,  
 216 soil profile was treated as a three soil-layer system: (1) a moss plus fibric soil organic layer, (2) a  
 217 humic organic soil layer, and (3) a mineral soil layer, and temperature for each layer can be  
 218 derived from STM (Zhuang et al., 2001, 2002, 2003). Temperature in moss layer is estimated  
 219 with STM.

220 A water balance module (WBM) was also incorporated into TEM 5.0 to simulate soil  
 221 hydrologic dynamics (Vörösmarty et al., 1989; Zhuang et al., 2001). The WBM receives  
 222 information on precipitation, air temperature, potential evapotranspiration, vegetation, soils and  
 223 elevation to predict soil moisture evapotranspiration and runoff (Vörösmarty et al., 1989). The  
 224 whole soil was treated as a single profile in WBM (Vörösmarty et al., 1989; Zhuang et al., 2001).  
 225 To simulate moss moisture, we added a moss layer on the soil profile by modifying the WBM  
 226 (Figure 2). Similar to soil moisture, moss moisture is also treated as a state variable in the revised  
 227 WBM, which is modeled as:

$$228 \quad \frac{dM}{dt} = \frac{1}{\rho_w} \left( \frac{dW}{dt} - \frac{dW_s}{dt} - \frac{dW_m}{dt} \right) \quad (17)$$

where the term “percolation” denotes the percolation from moss, which is the sum of rainfall percolation and snowmelt percolation from moss. We assume that there is no runoff from moss layer.

Accompanied by the above equation, changes in soil water (SM) is modified as:

$$\frac{dSM}{dt} = P_{moss} - P_{veg} - P_{soil} + P_{atm} + P_{runoff} - P_{percolation}$$

Calculations for these water fluxes regarding ~~higher plant~~vascular plants were not changed. More details about an earlier version of WBM were described in Vörösmarty et al. (1989) and Zhuang et al. (2001).

### 2.3 Model parameterization and validation

The newly introduced parameters that are associated with moss activities were documented in Table 1. We parameterized the TEM\_Moss for six representative ecosystem types in northern high latitudes with gap-filled monthly net ecosystem productivity (NEP, gCm<sup>-2</sup>mon<sup>-1</sup>) data from the AmeriFlux network (Davidson et al., 2000). We assumed that the moss types are associated with the representative ecosystem types, which means we tuned the moss-related parameters for the six representative ecosystem types. Except for the moss-related parameters, other parameters related to vascular high~~plants~~vegetations are default based on Zha and Zhuang, 2018. The information of six sites that we chose to calibrate the TEM\_Moss was compiled in Table 2. The parameterization was conducted using a global optimization algorithm known as SCE-UA (Shuffled complex evolution) method, which aims to minimize the difference between model simulations and measurements (Duan et al., 1994). In our calibration, the cost function of the minimization is:



$$\frac{\sum_{i=1}^k |NEP_{measured,i} - NEP_{simulated,i}|}{k} \quad (19)$$

Where  $NEP_{measured,i}$  and  $NEP_{simulated,i}$  are the measured and simulated NEP, respectively.  $k$  is the number of data pairs for comparison. Fifty independent sets of parameters were converged to minimize the objective function, and finally the optimized parameters were derived as the mean of these 50 sets of inversed parameters. We presented the boxplot of parameter posterior distributions at sites chosen for calibration (Figure 4). At the same time, the results of model parameterization were shown in Figure 3. Besides these parameters related to moss, all other parameters use their default values in TEM 5.0 (Zhuang et al., 2010, 2015). These optimized parameters were used for model validation and extrapolation.

We verified the TEM\_Moss simulated NEP, soil moisture and soil temperature. First, we conducted site-level simulations at six sites that contain level-4 gap-filled monthly NEP data from the AmeriFlux network (Table 3). Site-level monthly gap-filled soil moisture and soil temperature data were organized from the ORNL DAAC Dataset (<https://daac.ornl.gov/>) to make comparison with model simulations (Table 4 and Table 5). Local climate data including monthly air temperature (°C), precipitation (mm), and cloudiness (%) were obtained to drive these model simulations.

## 2.4 Regional Extrapolation

With six site-level calibrated parameters, TEM-Moss is applied to the region the-pixel by pixel based on simulation on the basis of vegetation distribution dataclass. Both TEM\_Moss and TEM 5.0 were applied to northern high latitudes (above 45 °N) for historical (the 20<sup>th</sup> century) and future (the 21<sup>st</sup> century) quantifications on carbon dynamics. For historical simulations, climatic forcing data including monthly air temperature, precipitation, and cloudiness and atmospheric CO<sub>2</sub>

concentrations during the 20<sup>th</sup> century, were collected from the Climatic Research Unit (CRU TS3.1) from the University of East Anglia (Harris et al., 2014). Other ancillary inputs including gridded soil texture (Zhuang et al., 2015), elevation (Zhuang et al., 2015), and potential natural vegetation (Melillo et al., 1993) were also organized. For future simulations, two contrasting Intergovernmental Panel on Climate Change (IPCC) climate scenarios (RCP 2.6 and RCP 8.5) were used to drive the models. The future climate forcing data and atmospheric CO<sub>2</sub> concentrations during the 21<sup>st</sup> century under these two climate change scenarios were derived from the HadGEM2-ESmodel, which is a member of CMIP5project213 (<https://esgf-node.llnl.gov/search/cmip5/>, January 2017).

Simulations were conducted at a spatial resolution of 0.5° latitude × 0.5° longitude (Zhuang et al., 2001, 2002). A spin-up was run to reach an equilibrium for each pixel, and the values of state variables at equilibrium were treated as initial values for transient simulations (McGuire et al., 1992). Specifically, we chose the first 30 years in the whole 100-year climatic forcing data to spin-up the models when conducting historical and future simulations. For each of the simulations, net primary production (NPP), heterotrophic respiration (R<sub>H</sub>), and net ecosystem production (NEP) were analyzed. We denoted that a positive NEP represents a CO<sub>2</sub> sink from the atmosphere to terrestrial ecosystems, while a negative value represents a source of CO<sub>2</sub> from terrestrial ecosystems to the atmosphere.

In these simulations, for each pixel, we assumed its moss distribution area is the same as the ~~higher plant~~vascular plants distribution. The total carbon uptake/emission of mosses in a pixel are calculated as the multiplication of pixel area with the carbon fluxes such as NEP (units: gC m<sup>-2</sup> month<sup>-1</sup>). Moss-related parameters for representative ecosystems are calibrated (Fig. 4 and Table

1) or obtained from previous model parameterization and the rest of model parameters are default from Zha and Zhuang (2018).

### 3. Results

#### 3.1 Model Validation

TEM\_Moss was able to reproduce the monthly NEP and performed better than TEM 5.0 at chosen sites, with larger R-square values and smaller RMSE (Figure 5, Table 6). R-square for TEM\_Moss reached 0.94 at Bartlett Experimental Forest site and 0.72 at Ivotuk site (Table 6). R-square values for TEM 5.0 showed a similar pattern, reaching 0.91 and with minimum value of 0.43 at Bartlett Experimental Forest and Ivotuk sites, respectively (Table 6). Except for Ivotuk site, R-squares for TEM\_Moss are all higher than 0.8 at the chosen sites, while most R-squares for TEM 5.0 are from 0.62 to 0.75 (Table 6). On the other hand, RMSE for TEM\_Moss is lower than that for TEM 5.0 at each site (Table 6).

We presented the comparisons between measured and simulated volumetric soil moisture (VSM) from TEM\_Moss and TEM 5.0 (Figure 6). Statistical analysis shows that TEM\_Moss reproduces the soil moisture well with R-squares ranging from 0.51 at US-Bkg to 0.87 at US-Atq (Table 7). R-squares for TEM\_Moss are substantially higher than that for TEM 5.0 at most chosen sites, except for US-Atq (Table 7). RMSE for TEM\_Moss is lower than that for TEM 5.0 at each site (Table 7). Similarly, comparisons between measured and simulated soil temperature at 5 cm depth (ST\_5) from TEM\_Moss and TEM 5.0 indicated that TEM\_Moss can reproduce the soil temperature with R-squares ranging from 0.81 at US-Ho1 to 0.91 at US-Bkg, while TEM 5.0 reproduces the soil temperature with R-squares ranging from 0.69 at BE-Vie to 0.89 at US-Bkg (Figure 7; Table 8). Although R-squares for both models are relatively high and RMSE for

they are relatively low, TEM\_Moss still shows higher R-squares and lower RMSE than TEM 5.0 (Table 8).

### 3.2 Regional carbon dynamics during the 20<sup>th</sup> century

Both TEM\_Moss and TEM 5.0 were used to simulate northern high-latitude regional carbon balance during the 20<sup>th</sup> century (Figure 8). Higher NEP was correlated with the combination of relatively higher NPP and lower heterotrophic respiration ( $R_H$ ). TEM\_Moss indicated that the northern high latitudes acted as a carbon sink of 221.9 Pg with an inter-annual standard deviation of 0.31 PgC yr<sup>-1</sup> during the 20<sup>th</sup> century, which is 132.7 Pg larger than 89.2 Pg simulated by TEM 5.0 (Figure 8). The simulated NEP by TEM\_Moss ranges from 1.38 PgC yr<sup>-1</sup> to 3.05 PgC yr<sup>-1</sup>, while the range by TEM 5.0 was from 0.11 PgC yr<sup>-1</sup> to 1.75 PgC yr<sup>-1</sup> (Figure 8). The patterns of the simulated NEP from two models were similar, both showing a general increasing trend throughout the 20<sup>th</sup> century (Figure 8). By 2000, the TEM\_Moss simulation indicated that the northern high-latitude region stored 3.05 PgC yr<sup>-1</sup>, which is more than twice as the storage estimated by TEM 5.0 (1.33 PgC yr<sup>-1</sup>, Figure 8). Both models indicated that carbon uptake by the northern ecosystems during the second half of the 20<sup>th</sup> century was higher than the first half for most part of the region, and only a small portion of the region lost carbon in last century (Figure 9).

Simulated total NPP by TEM\_Moss was 9.6 PgC yr<sup>-1</sup>, ranging from 8.52 PgC yr<sup>-1</sup> to 10.65 PgC yr<sup>-1</sup> in the 20<sup>th</sup> century, with 1.69 PgC yr<sup>-1</sup> of moss NPP and 7.93 PgC yr<sup>-1</sup> of ~~higher~~ plantvascular plants NPP (Figure 8). Moss NPP ranges from 1.23 PgC yr<sup>-1</sup> to 2.14 PgC yr<sup>-1</sup> and the ratio of moss NPP to ~~higher~~ plantvascular plants NPP is 0.21 (Figure 8). TEM 5.0 estimated 0.8 PgC yr<sup>-1</sup> lower total NPP than TEM\_Moss, but 0.87 PgC yr<sup>-1</sup> higher NPP for ~~higher~~ plantvascular plants (Figure 8). On the other hand, average heterotrophic respiration in the 20<sup>th</sup>

century was  $7.38 \text{ PgC yr}^{-1}$  and all years were within about 5% of this value (Figure 8). TEM 5.0 projected  $0.53 \text{ PgC yr}^{-1}$  higher  $R_H$  than TEM\_Moss ( $7.91 \text{ PgC yr}^{-1}$ , Figure 8). Overall, TEM\_Moss predicted higher total NPP but lower  $R_H$ , which jointly caused a pronounced difference in NEP between two models.

Both models estimated that soil organic carbon and vegetation carbon were accumulating continuously in the 20<sup>th</sup> century (Figure 10). TEM\_Moss indicated that regional SOC and VEGC accumulated  $96.3 \text{ PgC}$  and  $115.2 \text{ PgC}$ , respectively, and the carbon uptake by moss was  $10.4 \text{ Pg}$  in the period (Figure 10, Table 10). As simulated by TEM\_Moss, 43.4%, 51.9% and 4.7% of total carbon uptake in the region was assimilated to soils, ~~higher-plant~~vascular plants and mosses, respectively (Table 10). TEM 5.0 simulated that SOC increased by  $31.7 \text{ Pg}$  at the end of the 20<sup>th</sup> century, which is  $64.6 \text{ PgC}$  less than the value estimated by TEM\_Moss (Table 10). TEM 5.0 estimated  $57.7 \text{ PgC}$  in plants less than the value estimated by TEM\_Moss ( $57.5 \text{ PgC}$ , Table 10). 35.5% and 64.5% of total carbon was as SOC and VEGC, respectively.

### 3.3 Regional carbon dynamics during the 21<sup>st</sup> century

Under the RCP 2.6 scenario, TEM\_Moss simulated NEP of  $2.07 \text{ PgC yr}^{-1}$  with the range from  $0.41 \text{ PgC yr}^{-1}$  to  $3.2 \text{ PgC yr}^{-1}$ , and the inter-annual standard deviation of  $0.59 \text{ PgC yr}^{-1}$  during the 21<sup>st</sup> century (Figure 11 (a)). The regional sink shows a decreasing pattern in the 2000s and then generally increases over the remaining years of the 21<sup>st</sup> century (Figure 11 (a)). For comparison, TEM 5.0 predicted that the average NEP of  $0.28 \text{ PgC yr}^{-1}$  with the range from  $-1.48 \text{ PgC yr}^{-1}$  to  $1.69 \text{ PgC yr}^{-1}$  during the 21<sup>st</sup> century (Figure 11 (a)). Thus, TEM 5.0 projected  $179.1 \text{ PgC}$  stored in northern ecosystems is less than the estimation from TEM\_Moss in the 21<sup>st</sup> century. Besides, TEM 5.0 simulated that the regional NEP showed a decreasing trend and the region fluctuates between sinks and sources during the century (Figure 11 (a)). The spatial

patterns from two models also showed differences. TEM\_Moss indicated that the region accumulates carbon over this century, while TEM 5.0 simulated that some regions changed from a carbon sink to a source in the second half of the century (Figure 12 (a)). Simulated regional NPP by TEM\_Moss ranges from 11.2 to 13.7 PgC yr<sup>-1</sup> with a mean of 12.98 PgC yr<sup>-1</sup> in this century, while average NPP predicted by TEM 5.0 is 1.46 PgC yr<sup>-1</sup> lower than that value (11.52 PgC yr<sup>-1</sup> (Figure 11(a)). TEM\_Moss simulated NPP has 3.74 PgC yr<sup>-1</sup> from moss and 9.24 PgC yr<sup>-1</sup> from ~~higher plant~~vascular plants, which account for 28.8% and 71.2% of total NPP, respectively (Figure 11(a)). Meanwhile, TEM\_Moss estimated that R<sub>H</sub> is 10.91 PgC yr<sup>-1</sup>, while TEM 5.0 predicted it as ~~11.240.33~~ PgC yr<sup>-1</sup>, which is higher (Figure 11(a)). Both models projected that soil organic carbon and vegetation carbon accumulate in this century but with different magnitudes (Figure 13 (a)). TEM\_Moss predicted that regional SOC and VEGC accumulated 84.7 PgC and 112.6 PgC, respectively, during the 21<sup>st</sup> century, while TEM 5.0 predicted that a smaller increase with 12.1 and 15.5 PgC in SOC and VEGC, respectively (Figure 13 (a), Table 12 (a)). Besides, TEM\_Moss also predicted an increasing of 9.4 PgC in MOSSC, accounting for 4.5% of the total carbon uptake in this region (Table 12(a)).

Under the RCP 8.5 scenario, TEM\_Moss simulated annual NPP of 13.84 PgC yr<sup>-1</sup> with a range from 11.09 to 16.94 PgC yr<sup>-1</sup>, which is 1.31 PgC yr<sup>-1</sup> higher than the projection from TEM 5.0 (Figure 11 (b)). Total NPP estimated by TEM\_Moss has 3.84 PgC yr<sup>-1</sup> from moss and 10 PgC yr<sup>-1</sup> from ~~higher plant~~vascular plants (Figure 11(b)). Annual R<sub>H</sub> was 11.28 PgC yr<sup>-1</sup> estimated by TEM\_Moss and 11.54 PgC yr<sup>-1</sup> by TEM 5.0, respectively (Figure 11(b)). Consequently, TEM\_Moss projected NEP was 2.56 PgC yr<sup>-1</sup> with the inter-annual standard deviation of 0.93 PgC yr<sup>-1</sup> in this century (Figure 11 (b)). NEP ranges from 0.67 PgC yr<sup>-1</sup> to 4.78 PgC yr<sup>-1</sup> estimated with TEM\_Moss, while from -1.69 PgC yr<sup>-1</sup> to 2.65 PgC yr<sup>-1</sup> with a mean of

0.99 PgC yr<sup>-1</sup> was estimated by TEM 5.0 (Figure 11 (b)). TEM\_Moss predicted more carbon uptake of 157.5 Pg than TEM 5.0 during the 21<sup>st</sup> century. Both models predicted that NEP showed an increasing trend during the 21<sup>st</sup> century (Figure 11 (b)). Moreover, similar spatial patterns of carbon sinks and sources appeared in the projections from two models (Figure 12 (b)). Soil organic carbon and vegetation carbon shows an increasing trend from both models (Figure 13 (b)). Regional SOC and VEGC increased by 92.5 PgC and 153.6 PgC, respectively by the end of the 21<sup>st</sup> century predicted by TEM\_Moss. In contrast, the increase of 44.2 PgC and 54.5 PgC of SOC and VEGC, respectively, was predicted by TEM 5.0 (Figure 13 (b), Table 12 (b)). TEM\_Moss predicted an increase of 10.1 PgC in MOSSC (Table 12(b)).

## **4. Discussion**

### **4.1 The role of moss in the regional carbon dynamics**

Global warming has been pronounced in recent decades, particularly at high latitudes (IPCC, 2014; Tape et al., 2006; Stow et al., 2004). An enormous amount of soil organic carbon stored in northern high-latitude regions (Tarnocai et al., 2009; Schuur et al., 2008) is expected to affect a broad spectrum of ecological and human systems, and cause rapid changes in the Earth system when undergoing substantial climate change (Serreze and Francis 2006; Davidson and Janssens, 2006; McGuire et al., 2009). Improving projections for carbon budget of high latitude terrestrial ecosystems is essential for understanding global carbon–climate feedbacks (Melillo et al., 2011; Todd-Brown et al., 2013).

Our simulations suggest that mosses play an important role in the regional carbon dynamics, which is consistent with previous studies (McGuire et al., 2009; Turetsky et al., 2012). First of all, mosses are productive with carbon assimilation even during low temperature, water content and irradiance (Kallio and Heinonen, 1975; Harley et al., 1989). For example, mosses

can tolerate drought through physiological responses, such as by suspending metabolism and by withstanding cell desiccation (Turetsky et al., 2012; Oechel and Van Cleve, 1986). The key functional traits related to water, nutrient, and thermal tolerances of mosses enable them to fit in harsh northern conditions (Shetler et al., 2008; Turetsky et al., 2012). Thus, with incorporation of moss into our models, ~~the total~~ NPP estimation in our model is ~~affected. improved~~ ~~(The referee requires me to direct a figure to prove this sentence, but I am not sure which figure should I direct).~~ Mosses also act as a powerful competitor with vascular plants for nutrient uptake. Their rapid nutrient acquisition and slow nutrient loss through slow decomposition may constrain concentrations of plant-available nitrogen (Hobbie et al., 2000; Turetsky et al., 2010; Oechel and Van Cleve, 1986; Gornall et al., 2007), which will further decrease NPP of ~~higher-plant~~vascular plants. Our model results suggested that the NPP of ~~higher-plant~~vascular plants considering moss is indeed lower than previous NPP estimates without considering moss, but the total NPP is larger than before. We estimated that mosses contribute 17.6% of NPP in the 20<sup>th</sup> century, and 28.8% and 27.6% in the 21<sup>st</sup> century under the RCP 2.6 and RCP 8.5 scenarios, respectively. This is comparable with the results reported by a synthesis study, Turetsky et al. (2010), which indicating suggested an average contribution ~~of~~ 20% of aboveground NPP from moss in upland boreal forests and the contribution is 48% in wetlands ecosystems. Frolking et al. (1996) even reported a contribution of 38.4% to total NPP by moss at a boreal forest site. Moreover, mosses can also influence heterotrophic respiration ( $R_H$ ) through their effects on soil thermal and hydrologic dynamics (Zhuang et al., 2001). With the layer of moss, soil temperature tends to decrease but soil moisture tends to increase (Oechel and Van Cleve, 1986), which will further decrease soil respiration in summer. This supports our results that TEM\_Moss simulated  $R_H$  is lower than that by TEM 5.0. With a combination of higher NPP and lower  $R_H$ , NEP predicted by



TEM\_Moss is larger than that by TEM 5.0. The two contrasting regional simulations by TEM\_Moss and TEM 5.0 indicated the region is currently a carbon sink, which is consistent with previous studies (White et al., 2000; McGuire et al., 2009; Schimel et al., 2001). Our study estimates that regional NEP during the 20<sup>th</sup> century is 2.2 Pg C yr<sup>-1</sup> by TEM\_Moss and 0.89 Pg C yr<sup>-1</sup> by TEM 5.0, respectively. In the 1990s, the regional sink is projected to be 2.7 and 1.1 Pg C yr<sup>-1</sup> by TEM\_Moss and TEM 5.0 respectively. Compared with other existing studies, our regional estimates of NEP are within the reasonable range from other existing studies. McGuire et al. (2009) estimated a land sink of 0.3–0.6 Pg C yr<sup>-1</sup> for the pan-arctic region for the 1990s, which is closer to our estimation by TEM 5.0 but less than the projection by TEM\_Moss. The top-down atmospheric analyses indicate that the sink of pan-arctic region is between 0 and 0.8 Pg C yr<sup>-1</sup> in the 1990s (Menon et al. 2007). Besides, Schimel et al. (2001) reported an estimation of the northern extratropical NEP is from 0.6 to 2.3 PgC yr<sup>-1</sup> in the late 20<sup>th</sup> century, which is comparable to our estimates. Our simulations also confirmed that mosses and ~~higher plant~~  
~~plant~~ vascular plants respond to climate change similarly in terms of their productivity (Turetsky et al. 2010).

## 4.2 Model Uncertainty and limitations

There are a number of uncertainty sources in our model simulations. First, due to the limited understanding of moss photosynthesis (He et al., 2015) and various moss N uptake pathways (e.g., Bay et al 2013; Berg et al 2013), a few important assumptions have been made in our modeling. For instance, we assume that mosses behave similarly to vascular plants regarding photosynthesis and soil N uptake is the only pathway for mosses without considering N uptake through N fixers and atmospheric wet N deposition (Ayres et al. 2006). ~~Second, First,~~ the errors in the observed data will influence our parameterization results, which will bias our regional

estimates of carbon dynamics. Second, climatic driving data are also a source of uncertainty for historical and future simulations. Third, model assumptions will also induce additional uncertainties. For instance, we assumed that vegetation distribution will remain unchanged during the transient simulation. However, vegetation will change in response to warming climate and disturbances such as fire and insect outbreaks in the region (Hansen et al., 2006), which will affect carbon budget. Missing potential responses to disturbances in our model shall introduce additional uncertainties (Soja et al. 2007; Kasischke and Turetsky, 2006). [Future moss dynamics will also impact carbon dynamics in this region. For instance, a long-term warming experiments along natural climatic gradients, ranging from Swedish subarctic birch forest and subarctic/subalpine tundra to Alaskan arctic tussock tundra concluded that both diversity and abundance of mosses are likely to decrease under arctic climate warming \(Long et al. 2012\). Similarly, total moss cover declined in both heath and mesic meadow under experimental long-term warming \(by 1.5–3 °C\), driven by general declines in many species \(Alatalo et al., 2020\). Due to global warming, significant losses in moss diversity are expected in boreal forests and alpine biomes, leading to changes in ecosystem structure and function, nutrient cycling, and carbon balance \(He et al., 2015\).](#)

We conducted ensemble regional simulations with 50 sets of parameters to quantify model uncertainty due to uncertain parameters. The 50 sets of parameters were obtained using the method in Tang and Zhuang (2008). The ensemble means and the inter-simulation standard deviations are used to measure the model uncertainty (Figure 14). TEM\_Moss predicted that the regional cumulative carbon ranges from a carbon loss of 266 Pg C to a carbon sink of 567.3 Pg C by different ensemble members, with a mean of  $161.1 \pm 142.1$  Pg during the 21<sup>st</sup> century under the

RCP 2.6 scenario. Under the RCP 8.5 scenario, TEM\_Moss predicted that the region acts from a carbon source of 79.1 Pg C to a carbon sink of 625.9 Pg C, with a mean of  $186.7 \pm 166.1$  Pg during the 21<sup>st</sup> century (Figure 14).

This study took an important step to incorporate moss into an extant ecosystem model that has not explicitly consider the role of moss and its interactions with ~~higher plant~~vascular plants. Our model simulations showed that mosses have strong influences on regional ecosystem carbon cycling, by affecting the soil thermal, nitrogen availability, and water conditions of terrestrial ecosystems. However, there are still limitations in our model. First, we did not differentiate various kinds of mosses because they have their own functional traits. ~~Different kinds of mosses may differ in levels provide different levels of insulation provided for soil, resulting in different soil thermal conditions that and their associated affect microbial activities~~omes. ~~In our model, the moss types are just differentiated by the vegetation types~~. The structural and physiological traits of mosses will differ largely in different moss groups, such as feather moss versus Sphagnum (Turetsky et al., 2010). In addition, we lack spatially explicit information of moss distribution in the region, which will lead to a large regional uncertainty of carbon quantification. We assumed that moss area distribution is the same as its associated vegetation distribution. Another limitation is that some important physiological traits of moss have not been modeled. For example, moss abundance may change following shifts in vascular species composition due to shading or burial by vascular litter (Turetsky et al., 2010; Cornelissen et al., 2007). Furthermore, disturbance such as wildfires can also influence moss activities.

## 5. Conclusions

This study explicitly incorporated moss into an extant process-based terrestrial ecosystem model to investigate the carbon dynamics in the Arctic for present day and future. Historical regional

simulations with TEM\_Moss indicated that the region is a carbon sink of 221.9 PgC over the 20<sup>th</sup> century, and this sink may decrease to 206.7 PgC under the RCP 2.6 scenario or increase to 256.2 PgC under the RCP 8.5 scenario during the 21<sup>st</sup> century. Compared with an earlier version of TEM that has not explicitly modeled moss, TEM\_Moss projected that the region stored 132.7 Pg more C over the last century, 179.1 Pg and 157.5 Pg more C under the RCP 2.6 and RCP 8.5 scenarios, respectively. This study demonstrated that moss activities have large effects on ecosystem soil thermal, water, and carbon dynamics through their interactions with ~~higher plant~~vascular plants. This study highlights the importance of considering the moss dynamics in Earth System Models to adequately quantify the carbon–climate feedbacks in the Arctic.

## 6. Acknowledgments

This research was supported by an NSF project (IIS-1027955), a DOE project (DE-SC0008092), and a NASA LCLUC project (NNX09AI26G). We acknowledge the Rosen High Performance Computing Center at Purdue for computing support. We also acknowledge the World Climate Research Programme’s Working Group on Coupled Modeling Intercomparison Project CMIP5, and we thank the climate modeling groups for producing and making available their model output. The data of this study can be accessed from Purdue Research Repository.

## References

Juha M Alatalo, Annika K Jägerbrand, Mohammad Bagher Erfanian, Shengbin Chen, Shou-Qin Sun, Ulf Molau, Bryophyte cover and richness decline after 18 years of experimental warming in alpine Sweden, AoB PLANTS, Volume 12, Issue 6, December 2020, plaa061, <https://doi.org/10.1093/aobpla/plaa061>

Allison, S. D., and Treseder, K. K.: Warming and drying suppress microbial activity and carbon cycling in boreal forest soils, *Global change biology*, 14, 2898-2909, 10.1111/j.1365-2486.2008.01716.x, 2008.

525 Basilier, K.: Moss-associated nitrogen fixation in some mire and coniferous forest environments around  
 526 Uppsala, Sweden, *Lindbergia*, 5, 84-88, 1979.  
 527 [Bay, G., Nahar, N., Oubre, M., Whitehouse, M.J., Wardle, D.A., Zackrisson, O., Nilsson, M.-C. and](#)  
 528 [Rasmussen, U. \(2013\), Boreal feather mosses secrete chemical signals to gain nitrogen. \*New Phytol\*, 200:](#)  
 529 [54-60. <https://doi.org/10.1111/nph.12403>](#)  
 530 Ben Bond-Lamberty, S. T. G., Douglas E. Ahl and Peter E. Thornton: Reimplementation of the Biome-  
 531 BGC model to simulate successional change, *Tree Physiology*, 25, 413–424, 2005.  
 532  
 533 [Berg, Andreas, et al. “Transfer of Fixed-N from N<sub>2</sub>-Fixing Cyanobacteria Associated with the Moss](#)  
 534 [Sphagnum Riparium Results in Enhanced Growth of the Moss.” \*Plant and Soil\*, vol. 362, no. 1/2, 2013,](#)  
 535 [pp. 271–278. JSTOR, \[www.jstor.org/stable/42951898\]\(http://www.jstor.org/stable/42951898\). Accessed 28 May 2021.](#)  
 536  
 537 Bond-Lamberty, B., Peckham, S. D., Ahl, D. E., and Gower, S. T.: Fire as the dominant driver of central  
 538 Canadian boreal forest carbon balance, *Nature*, 450, 89-92, 10.1038/nature06272, 2007.  
 539 Bond-Lamberty, B., and Thomson, A.: Temperature-associated increases in the global soil respiration  
 540 record, *Nature*, 464, 579-582, 10.1038/nature08930, 2010.  
 541 Cahoon, S. M., Sullivan, P. F., Shaver, G. R., Welker, J. M., Post, E., and Holyoak, M.: Interactions  
 542 among shrub cover and the soil microclimate may determine future Arctic carbon budgets, *Ecology*  
 543 *letters*, 15, 1415-1422, 10.1111/j.1461-0248.2012.01865.x, 2012.  
 544 Chadburn, S. E., Burke, E. J., Cox, P. M., Friedlingstein, P., Hugelius, G., and Westermann, S.: An  
 545 observation-based constraint on permafrost loss as a function of global warming, *Nature Climate Change*,  
 546 7, 340-344, 10.1038/nclimate3262, 2017.  
 547 Charles J. Vörösmarty, B. M. I., Annette L. Grace, and M. Patricia Gildea: Continental scale models of  
 548 water balance and fluvial transport: an application to South America, *Global biogeochemical cycles*, 3,  
 549 241-265, 1989.  
 550 Christian Fritz, L. P. M. L., Muhammad Riaz, Leon J. L. van den Berg, Theo J. T.M. Elzenga: *Sphagnum*  
 551 *Mosses - Masters of Efficient N-Uptake while Avoiding Intoxication*, *PLoS ONE*, 9,  
 552 10.1371/journal.pone.0079991, 2014.  
 553 Clarke, G. C. S.: Productivity of Bryophytes in Polar Regions, *Annals of botany*, 35, 99–108, 1971.  
 554 Collins, W. C. O. a. N. J.: Comparative CO<sub>2</sub> exchange patterns in mosses from two tundra habitats at  
 555 Barrow, Alaska, *Canadian Journal of Botany*, 54, 1355-1369, 1976.  
 556 Cornelissen, J. H., Lang, S. I., Soudzilovskaia, N. A., and During, H. J.: Comparative cryptogam ecology:  
 557 a review of bryophyte and lichen traits that drive biogeochemistry, *Annals of botany*, 99, 987-1001,  
 558 10.1093/aob/mcm030, 2007.

Davidson, E. A., Trumbore, S. E., and Amundson, R.: Soil warming and organic carbon content, *Nature*, 408, 789, 10.1038/35048672, 2000.

Davidson, E. A., and Janssens, I. A.: Temperature sensitivity of soil carbon decomposition and feedbacks to climate change, *Nature*, 440, 165-173, 10.1038/nature04514, 2006.

Davidson, E. A., Janssens, I. A., and Luo, Y.: On the variability of respiration in terrestrial ecosystems: moving beyond Q<sub>10</sub>, *Global change biology*, 12, 154-164, 10.1111/j.1365-2486.2005.01065.x, 2006.

DeLuca, T. H., Zackrisson, O., Gentili, F., Sellstedt, A., and Nilsson, M. C.: Ecosystem controls on nitrogen fixation in boreal feather moss communities, *Oecologia*, 152, 121-130, 10.1007/s00442-006-0626-6, 2007.

Duan, Q., Sorooshian, S., and Gupta, V. K.: Optimal use of the SCE-UA global optimization method for calibrating watershed models, *Journal of Hydrology*, 158, 265-284, 1994.

E. S. Euskirchen, A. D. M., F. S. Chapin, III, S. Yi, and C. C. Thompson: Changes in vegetation in northern Alaska under scenarios of climate change, 2003–2100: implications for climate feedbacks, *Ecological Applications*, 19, 1022–1043, 2009.

Edward A. G. Schuur, J. B., Josep G. Canadell, Eugenie Euskirchen, Christopher B., Field, S. V. G., Stefan Hagemann, Peter Kuhry, Peter M. Lafleur, Hanna Lee, Galina, Mazhitova, F. E. N., Annette Rinke, Vladimir E. Romanovsky, Nikolay Shiklomanov, and Charles Tarnocai, S. V., Jason G. Vogel, And Sergei A. Zimov: Vulnerability of Permafrost Carbon to Climate Change: Implications for the Global Carbon Cycle, *BioScience*, 58, 701-714, 2008.

Edward Ayres, R. v. d. W., Martin Sommerkorn, Richard D. Bardgett: Direct uptake of soil nitrogen by mosses, *Biology Letters*, 2, 286-288, 10.1098/rsbl.2006.0455, 2006.

Esteban G. Jobbágy, and Jackson, R. B.: The vertical distribution of soil organic carbon and its relation to climate and vegetation, *Ecological applications*, 10, 423-436, 2000.

Frolking, S., Roulet, N. T., Tuittila, E., Bubier, J. L., Quillet, A., Talbot, J., and Richard, P. J. H.: A new model of Holocene peatland net primary production, decomposition, water balance, and peat accumulation, *Earth System Dynamics*, 1, 1-21, 10.5194/esd-1-1-2010, 2010.

Gilmanov, T. G., Tieszen, L. L., Wylie, B. K., Flanagan, L. B., Frank, A. B., Haferkamp, M. R., Meyers, T. P., and Morgan, J. A.: Integration of CO<sub>2</sub> flux and remotely-sensed data for primary production and ecosystem respiration analyses in the Northern Great Plains: potential for quantitative spatial extrapolation, *Global Ecology and Biogeography*, 14, 271-292, 10.1111/j.1466-822X.2005.00151.x, 2005.

Gornall, J. L., Jonsdottir, I. S., Woodin, S. J., and Van der Wal, R.: Arctic mosses govern below-ground environment and ecosystem processes, *Oecologia*, 153, 931-941, 10.1007/s00442-007-0785-0, 2007.

Gornall, J. L., Woodin, S. J., Jonsdottir, I. S., and van der Wal, R.: Balancing positive and negative plant interactions: how mosses structure vascular plant communities, *Oecologia*, 166, 769-782, 10.1007/s00442-011-1911-6, 2011.

Gough, C. M., Hardiman, B. S., Nave, L. E., Bohrer, G., Maurer, K. D., Vogel, C. S., Nadelhoffer, K. J., and Curtis, P. S.: Sustained carbon uptake and storage following moderate disturbance in a Great Lakes forest, *Ecological Applications*, 23, 1202-1215, 2013.

Goulden, M. L., Winston, G. C., McMillan, A. M. S., Litvak, M. E., Read, E. L., Rocha, A. V., and Rob Elliot, J.: An eddy covariance mesonet to measure the effect of forest age on land-atmosphere exchange, *Global change biology*, 12, 2146-2162, 10.1111/j.1365-2486.2006.01251.x, 2006.

Hansen, J., Sato, M., Ruedy, R., Lo, K., Lea, D. W., and Medina-Elizade, M.: Global temperature change, *Proceedings of the National Academy of Sciences of the United States of America*, 103, 14288-14293, 10.1073/pnas.0606291103, 2006.

Harris, I., Jones, P. D., Osborn, T. J., and Lister, D. H.: Updated high-resolution grids of monthly climatic observations - the CRU TS3.10 Dataset, *International Journal of Climatology*, 34, 623-642, 10.1002/joc.3711, 2014.

Hayes, D. J., McGuire, A. D., Kicklighter, D. W., Gurney, K. R., Burnside, T. J., and Melillo, J. M.: Is the northern high-latitude land-based CO<sub>2</sub> sink weakening?, *Global Biogeochemical Cycles*, 25, n/a-n/a, 10.1029/2010gb003813, 2011.

Hayes, D. J., Kicklighter, D. W., McGuire, A. D., Chen, M., Zhuang, Q., Yuan, F., Melillo, J. M., and Wullschleger, S. D.: The impacts of recent permafrost thaw on land-atmosphere greenhouse gas exchange, *Environmental Research Letters*, 9, 045005, 10.1088/1748-9326/9/4/045005, 2014.

[Xiaolan He, Kate S. He, Jaakko Hyvönen, Will bryophytes survive in a warming world?, Perspectives in Plant Ecology, Evolution and Systematics, Volume 19, 2016, Pages 49-60, ISSN 1433-8319, https://doi.org/10.1016/j.ppees.2016.02.005.](#)

Hiller, R. V., McFadden, J. P., and Kljun, N.: Interpreting CO<sub>2</sub> Fluxes Over a Suburban Lawn: The Influence of Traffic Emissions, *Boundary-Layer Meteorology*, 138, 215-230, 10.1007/s10546-010-9558-0, 2010.

Hugelius, G., Strauss, J., Zubrzycki, S., Harden, J. W., Schuur, E. A. G., Ping, C. L., Schirrmeister, L., Grosse, G., Michaelson, G. J., Koven, C. D., and others, Donnell, J. A., Elberling, B., Mishra, U., Camill, P., Yu, Z., Palmtag, J., and Kuhry, P.: Estimated stocks of circumpolar permafrost carbon with quantified uncertainty ranges and identified data gaps, *Biogeosciences*, 11, 6573-6593, 10.5194/bg-11-6573-2014, 2014.

625 Jägerbrand, A. K., Lindblad, K. E. M., Björk, R. G., Alatalo, J. M., and Molau, U.: Bryophyte and Lichen  
 626 Diversity Under Simulated Environmental Change Compared with Observed Variation in Unmanipulated  
 627 Alpine Tundra, *Biodiversity and Conservation*, 15, 4453-4475, 10.1007/s10531-005-5098-1, 2006.  
 628 Jenkins, J. P., Richardson, A. D., Braswell, B. H., Ollinger, S. V., Hollinger, D. Y., and Smith, M. L.:  
 629 Refining light-use efficiency calculations for a deciduous forest canopy using simultaneous tower-based  
 630 carbon flux and radiometric measurements, *Agricultural and Forest Meteorology*, 143, 64-79,  
 631 10.1016/j.agrformet.2006.11.008, 2007.  
 632 Kasischke, E. S.: Boreal ecosystems in the global carbon cycle. In *Fire, climate change, and carbon*  
 633 *cycling in the boreal forest*, *Ecological Studies (Analysis and Synthesis)*, 138, 19-30,  
 634 [https://doi.org/10.1007/978-0-387-21629-4\\_2](https://doi.org/10.1007/978-0-387-21629-4_2), 2000.  
 635 Kasischke, E. S., and Turetsky, M. R.: Recent changes in the fire regime across the North American  
 636 boreal region—Spatial and temporal patterns of burning across Canada and Alaska, *Geophysical Research*  
 637 *Letters*, 33, 10.1029/2006gl025677, 2006.  
 638 Kip, N., Ouyang, W., van Winden, J., Raghoebarsing, A., van Niftrik, L., Pol, A., Pan, Y., Bodrossy, L.,  
 639 van Donselaar, E. G., Reichart, G. J., Jetten, M. S., Damste, J. S., and Op den Camp, H. J.: Detection,  
 640 isolation, and characterization of acidophilic methanotrophs from *Sphagnum* mosses, *Applied and*  
 641 *environmental microbiology*, 77, 5643-5654, 10.1128/AEM.05017-11, 2011.  
 642 Knorr, W.: Annual and interannual CO<sub>2</sub> exchanges of the terrestrial biosphere: process-based simulations  
 643 and uncertainties, *Global Ecology and Biogeography*, 9, 225-252, 2000.  
 644 L. Kulmala, J. P., P. Hari and T. Vesala: Photosynthesis of ground vegetation in different aged pine forests:  
 645 Effect of environmental factors predicted with a process-based model, *Journal of Vegetation Science*, 22,  
 646 96–110, 2011.  
 647 Launiainen, S., Katul, G. G., Lauren, A., and Kolari, P.: Coupling boreal forest CO<sub>2</sub>, H<sub>2</sub>O and energy  
 648 flows by a vertically structured forest canopy – Soil model with separate bryophyte layer, *Ecological*  
 649 *Modelling*, 312, 385-405, 10.1016/j.ecolmodel.2015.06.007, 2015.  
 650 Lindo, Z., and Gonzalez, A.: The Bryosphere: An Integral and Influential Component of the Earth's  
 651 Biosphere, *Ecosystems*, 13, 612-627, 10.1007/s10021-010-9336-3, 2010.  
 652 [Lang, S.I., Cornelissen, J.H.C., Shaver, G.R., Ahrens, M., Callaghan, T.V., Molau, U., Ter Braak, C.J.F.,](https://doi.org/10.1111/j.1365-2486.2011.02570.x)  
 653 [Hölzer, A. and Aerts, R. \(2012\), Arctic warming on two continents has consistent negative effects on](https://doi.org/10.1111/j.1365-2486.2011.02570.x)  
 654 [lichen diversity and mixed effects on bryophyte diversity. \*Glob Change Biol\*, 18: 1096-1107.](https://doi.org/10.1111/j.1365-2486.2011.02570.x)  
 655 <https://doi.org/10.1111/j.1365-2486.2011.02570.x>  
 656  
 657 Longton, R. E.: Adaptations and strategies of polar bryophytes, *Botanical Journal of the Linnean Society*,  
 658 98, 253-268, 1988.



659 Markham, J. H.: Variation in moss-associated nitrogen fixation in boreal forest stands, *Oecologia*, 161,  
 660 353-359, 10.1007/s00442-009-1391-0, 2009.

661 McEwing, K. R., Fisher, J. P., and Zona, D.: Environmental and vegetation controls on the spatial  
 662 variability of CH<sub>4</sub> emission from wet-sedge and tussock tundra ecosystems in the Arctic, *Plant and soil*,  
 663 388, 37-52, 10.1007/s11104-014-2377-1, 2015.

664 McGuire, A. D., Melillo, J. M., Joyce, L. A., Kicklighter, D. W., Grace, A. L., III, B. M., and Vorosmarty,  
 665 C. J.: Interactions between carbon and nitrogen dynamics in estimating net primary productivity for  
 666 potential vegetation in North America, *Global Biogeochemical Cycles*, 6, 101-124, 1992.

667 McGuire, A. D., Melillo, J. M., Kicklighter, D. W., and Joyce, L. A.: Equilibrium responses of soil carbon  
 668 to climate change: Empirical and process-based estimates, *Journal of Biogeography*, 785-796, 1995.

669 McGuire, A. D., and Hobbie, J. E.: Global climate change and the equilibrium responses of carbon  
 670 storage in arctic and subarctic regions, In *Modeling the Arctic system: A workshop report on the state of*  
 671 *modeling in the Arctic System Science program*, 53-54, 1997.

672 McGuire, A. D., Anderson, L. G., Christensen, T. R., Dallimore, S., Guo, L., Hayes, D. J., Heimann, M.,  
 673 Lorensen, T. D., Macdonald, R. W., and Roulet, N.: Sensitivity of the carbon cycle in the Arctic to climate  
 674 change, *Ecological Monographs*, 79, 523-555, 2009.

675 Melillo, J. M., McGuire, A. D., Kicklighter, D. W., Moore, B., Vorosmarty, C. J., and Schloss, A. L.:  
 676 Global climate change and terrestrial net primary production, *Nature*, 363, 234, 10.1038/363234a0, 1993.

677 Melillo, J. M., Butler, S., Johnson, J., Mohan, J., Steudler, P., Lux, H., Burrows, E., Bowles, F., Smith, R.,  
 678 Scott, L., Vario, C., Hill, T., Burton, A., Zhou, Y.-M., and Tang, J.: Soil warming, carbon - nitrogen  
 679 interactions, and forest carbon budgets, *PNAS*, 108, 9508-9512, 2011.

680 Naomi Oreskes, K. S.-F., Kenneth Belitz: Verification, validation, and confirmation of numerical models  
 681 in the earth sciences, *Science*, 263, 641-646, 1994.

682 O. Skre, W. C. O.: Moss production in a black spruce *Picea mariana* forest with permafrost near  
 683 Fairbanks, Alaska, as compared with two permafrost-free stands, *Ecography*, 2, 249-254, 1979.

684 Oechel, W. C., Laskowski, C. A., Burba, G., Gioli, B., and Kalhori, A. A. M.: Annual patterns and budget  
 685 of CO<sub>2</sub> flux in an Arctic tussock tundra ecosystem, *Journal of Geophysical Research: Biogeosciences*,  
 686 119, 323-339, 10.1002/2013jg002431, 2014.

687 Okland, R. H.: Population Biology of the Clonal Moss *Hylocomium Splendens* in Norwegian Boreal  
 688 Spruce Forests. I. Demography, *Journal of Ecology*, 83, 697-712, 1995.

689 P.C. Harley, J. D. T., K.J. Murray, and J. Beyers: Irradiance and temperature effects on photosynthesis of  
 690 tussock tundra *Sphagnum* mosses from the foothills of the Philip Smith Mountains, Alaska, *Oecologia*,  
 691 79, 251-259, 1989.

692 Pakarinen, P., and D. H. Vitt: Primary production of plant communities of the Truelove Lowland, Devon  
 693 Island, Canada—Moss communities, Primary production and production processes, tundra biome.  
 694 International Biological Programme, Tundra Biome Steering Committee, Edmonton Oslo, 37-46, 1973.  
 695 Pharo, E. J., and Zartman, C. E.: Bryophytes in a changing landscape: The hierarchical effects of habitat  
 696 fragmentation on ecological and evolutionary processes, *Biological Conservation*, 135, 315-325,  
 697 10.1016/j.biocon.2006.10.016, 2007.  
 698 Raich, J. W., Rastetter, E. B., Melillo, J. M., Kicklighter, D. W., Steudler, P. A., Peterson, B. J., Grace, A.  
 699 L., III, B. M., and Vorosmarty, C. J.: Potential net primary productivity in South America: application of a  
 700 global model, *Ecological Applications*, 1, 399-429, 1991.  
 701 Richardson, A. D., Jenkins, J. P., Braswell, B. H., Hollinger, D. Y., Ollinger, S. V., and Smith, M. L.: Use  
 702 of digital webcam images to track spring green-up in a deciduous broadleaf forest, *Oecologia*, 152, 323-  
 703 334, 10.1007/s00442-006-0657-z, 2007.  
 704 Running, S. W., and Coughlan, J. C.: A general model of forest ecosystem processes for regional  
 705 applications I. Hydrologic balance, canopy gas exchange and primary production processes., *Ecological*  
 706 *Modelling*, 42, 125-154, 1988.  
 707 S. Frolking, M. L. G., S.C. Wofsy, S-M. Fan, D.J. Sutton, J.W. Munger, A.M. Bazzaz, B.C. Daube, P.M.  
 708 Crill, J.D, Aber, L.E. Band, X. Wang, K. Savage, T. Moore And R.C. Harriss: Modelling temporal  
 709 variability in the carbon balance of a spruce/moss boreal forest, *Global change biology*, 2, 343-366, 1996.  
 710 Sarah E. Hobbie, J. P. S., Susan E. Trumbore And James R. Randerson: Controls over carbon storage and  
 711 turnover in high-latitude soils, *Global change biology*, 6, 196-210, 2000.  
 712 Schimel, D. S., House, J. I., Hibbard, K. A., Bousquet, P., Ciais, P., Peylin, P., Braswell, B. H., Apps, M.  
 713 J., Baker, D., Bondeau, A., Canadell, J., Churkina, G., Cramer, W., Denning, A. S., Field, C. B.,  
 714 Friedlingstein, P., Goodale, C., Heimann, M., Houghton, R. A., Melillo, J. M., III, B. M., Murdiyarso, D.,  
 715 Noble, I., Pacala, S. W., Prentice, I. C., Raupach, M. R., Rayner, P. J., Scholes, R. J., Steffen, W. L., and  
 716 Wirth, C.: Recent patterns and mechanisms of carbon exchange by terrestrial ecosystems, *Nature*, 414,  
 717 2001.  
 718 Serreze, M. C., and Francis, J. A.: The Arctic on the fast track of change, *Weather*, 61, 65-69, 2006.  
 719 Shetler, G., Turetsky, M. R., Kane, E., and Kasischke, E.: Sphagnum mosses limit total carbon  
 720 consumption during fire in Alaskan black spruce forests, *Canadian Journal of Forest Research*, 38, 2328-  
 721 2336, 10.1139/x08-057, 2008.  
 722 Soja, A. J., Tchebakova, N. M., French, N. H. F., Flannigan, M. D., Shugart, H. H., Stocks, B. J.,  
 723 Sukhinin, A. I., Parfenova, E. I., Chapin, F. S., and Stackhouse, P. W.: Climate-induced boreal forest  
 724 change: Predictions versus current observations, *Global and Planetary Change*, 56, 274-296,  
 725 10.1016/j.gloplacha.2006.07.028, 2007.

726 Stow, D. A., Hope, A., McGuire, D., Verbyla, D., Gamon, J., Huemmrich, F., Houston, S., Racine, C.,  
 727 Sturm, M., Tape, K., Hinzman, L., Yoshikawa, K., Tweedie, C., Noyle, B., Silapaswan, C., Douglas, D.,  
 728 Griffith, B., Jia, G., Epstein, H., Walker, D., Daeschner, S., Petersen, A., Zhou, L., and Myneni, R.:  
 729 Remote sensing of vegetation and land-cover change in Arctic Tundra Ecosystems, *Remote Sensing of*  
 730 *Environment*, 89, 281-308, 10.1016/j.rse.2003.10.018, 2004.  
 731 T. G. Williams, L. B. F.: Measuring and modelling environmental influences on photosynthetic gas  
 732 exchange in Sphagnum and Pleurozium, *Plant, Cell and Environment*, 21, 555–564, 1998.  
 733 Tang, J., and Zhuang, Q.: Equifinality in parameterization of process-based biogeochemistry models: A  
 734 significant uncertainty source to the estimation of regional carbon dynamics, *Journal of Geophysical*  
 735 *Research: Biogeosciences*, 113, 10.1029/2008jg000757, 2008.  
 736 Tape, K. E. N., Sturm, M., and Racine, C.: The evidence for shrub expansion in Northern Alaska and the  
 737 Pan-Arctic, *Global change biology*, 12, 686-702, 10.1111/j.1365-2486.2006.01128.x, 2006.  
 738 Tarnocai, C., Canadell, J. G., Schuur, E. A. G., Kuhry, P., Mazhitova, G., and Zimov, S.: Soil organic  
 739 carbon pools in the northern circumpolar permafrost region, *Global Biogeochemical Cycles*, 23, n/a-n/a,  
 740 10.1029/2008gb003327, 2009.  
 741 Todd-Brown, K. E. O., Randerson, J. T., Post, W. M., Hoffman, F. M., Tarnocai, C., Schuur, E. A. G., and  
 742 Allison, S. D.: Causes of variation in soil carbon simulations from CMIP5 Earth system models and  
 743 comparison with observations, *Biogeosciences*, 10, 1717-1736, 10.5194/bg-10-1717-2013, 2013.  
 744 Treseder, K. K., Balser, T. C., Bradford, M. A., Brodie, E. L., Dubinsky, E. A., Eviner, V. T., Hofmockel,  
 745 K. S., Lennon, J. T., Levine, U. Y., MacGregor, B. J., Pett-Ridge, J., and Waldrop, M. P.: Integrating  
 746 microbial ecology into ecosystem models: challenges and priorities, *Biogeochemistry*, 109, 7-18,  
 747 10.1007/s10533-011-9636-5, 2011.  
 748 Treseder, K. K., Marusenko, Y., Romero-Olivares, A. L., and Maltz, M. R.: Experimental warming alters  
 749 potential function of the fungal community in boreal forest, *Global change biology*, 22, 3395-3404,  
 750 10.1111/gcb.13238, 2016.  
 751 Turetsky, M. R., Mack, M. C., Hollingsworth, T. N., and Harden, J. W.: The role of mosses in ecosystem  
 752 succession and function in Alaska's boreal forest This article is one of a selection of papers from The  
 753 Dynamics of Change in Alaska's Boreal Forests: Resilience and Vulnerability in Response to Climate  
 754 Warming, *Canadian Journal of Forest Research*, 40, 1237-1264, 10.1139/x10-072, 2010.  
 755 Turetsky, M. R., Bond-Lamberty, B., Euskirchen, E., Talbot, J., Frohking, S., McGuire, A. D., and Tuittila,  
 756 E. S.: The resilience and functional role of moss in boreal and arctic ecosystems, *The New phytologist*,  
 757 196, 49-67, 10.1111/j.1469-8137.2012.04254.x, 2012.  
 758 Wardle, M.-C. N. a. D. A.: Understory vegetation as a forest ecosystem driver: evidence from the northern  
 759 Swedish boreal forest, *The Ecological Society of America*, 3, 421–428, 2005.

White, A., Cannell, M. G. R., and Friend, A. D.: The high-latitude terrestrial carbon sink: a model analysis  
Global change biology, 6, 227-245, 2000.

Wieder, W. R., Bonan, G. B., and Allison, S. D.: Global soil carbon projections are improved by  
modelling microbial processes, Nature Climate Change, 3, 909-912, 10.1038/nclimate1951, 2013.

Zha, J., and Zhuang, Q.: Microbial decomposition processes and vulnerable Arctic soil organic carbon in  
the 21st century, Biogeosciences Discussions, 1-34, 10.5194/bg-2018-241, 2018.

Zhuang, Q., Romanovsky, V. E., and McGuire, A. D.: Incorporation of a permafrost model into a large-  
scale ecosystem model: Evaluation of temporal and spatial scaling issues in simulating soil thermal  
dynamics, Journal of Geophysical Research: Atmospheres, 106, 33649-33670, 10.1029/2001jd900151,  
2001.

Zhuang, Q., McGuire, A. D., O'Neill, K. P., Harden, J. W., Romanovsky, V. E., and Yarie, J.: Modeling  
soil thermal and carbon dynamics of a fire chronosequence in interior Alaska, Journal of Geophysical  
Research, 108, 10.1029/2001jd001244, 2002.

[Zhuang, Q., A. D. McGuire, J. M. Melillo, J. S. Clein, R. J. Dargaville, D. W. Kicklighter, R. B. Myneni,  
J. Dong, V. E. Romanovsky, J. Harden, J. E. Hobbie \(2003\) Carbon cycling in extratropical terrestrial  
ecosystems of the Northern Hemisphere during the 20th Century: A modeling analysis of the influences of  
soil thermal dynamics, Tellus, 55B, 751-776, 2003](#)

Zhuang, Q., He, J., Lu, Y., Ji, L., Xiao, J., and Luo, T.: Carbon dynamics of terrestrial ecosystems on the  
Tibetan Plateau during the 20th century: an analysis with a process-based biogeochemical model, Global  
Ecology and Biogeography, 19, 649-662, 10.1111/j.1466-8238.2010.00559.x, 2010.

Zhuang, Q., Chen, M., Xu, K., Tang, J., Saikawa, E., Lu, Y., Melillo, J. M., Prinn, R. G., and McGuire, A.  
D.: Response of global soil consumption of atmospheric methane to changes in atmospheric climate and  
nitrogen deposition, Global Biogeochemical Cycles, 27, 650-663, 10.1002/gbc.20057, 2013.

Zhuang, Q., Zhu, X., He, Y., Prigent, C., Melillo, J. M., David McGuire, A., Prinn, R. G., and Kicklighter,  
D. W.: Influence of changes in wetland inundation extent on net fluxes of carbon dioxide and methane in  
northern high latitudes from 1993 to 2004, Environmental Research Letters, 10, 095009, 10.1088/1748-  
9326/10/9/095009, 2015.

[BURKE, E. J., EKICI, A., HUANG, Y., CHADBURN, S. E., HUNTINGFORD, C., CIAIS, P.,  
FRIEDLINGSTEIN, P., PENG, S. & KRINNER, G. 2017. Quantifying uncertainties of  
permafrost carbon-climate feedbacks. \*D k q i g q u l 4 , 3 0 5 1 p 3 0 6 6 . u . "\*](#)

[COMYN-PLATT, E., HAYMAN, G., HUNTINGFORD, C., CHADBURN, S. E., BURKE, E. J.,  
HARPER, A. B., COLLINS, W. J., WEBBER, C. P., POWELL, T., COX, P. M., GEDNEY, N. &  
SITCH, S. 2018. Carbon budgets for 1.5 and 2 °C targets lowered by natural wetland and](#)

permafrost feedbacks. *Permafrost* 14:1-10.

KOVEN, C. D., SCHUUR, E. A. G., SCHÄDEL, C., BOHN, T. J., BURKE, E. J., CHEN, G.,  
CHEN, X., CIAIS, P., GROSSE, G., HARDEN, J. W., HAYES, D. J., HUGELIUS, G., JAFAROV,  
E. E., KRINNER, G., KUHRY, P., LAWRENCE, D. M., MACDOUGALL, A. H., MARCHENKO, S.  
S., MCGUIRE, A. D., NATALI, S. M., NICOLSKY, D. J., OLEFELDT, D., PENG, S.,  
ROMANOVSKY, V. E., SCHAEFER, K. M., STRAUSS, J., TREAT, C. C. & TURETSKY, M. 2015.  
A simplified, data-constrained approach to estimate the permafrost carbon-climate feedback.

*Journal of Geophysical Research* 120:367-373.

**Author contributions.** Q.Z. designed the study. J.Z. conducted model development, simulation  
and analysis. J.Z. and Q. Z. wrote the paper.

**Competing financial interests.** The submission has no competing financial interests.

**Materials & Correspondence.** Correspondence and material requests should be addressed to  
qzhuang@purdue.edu.

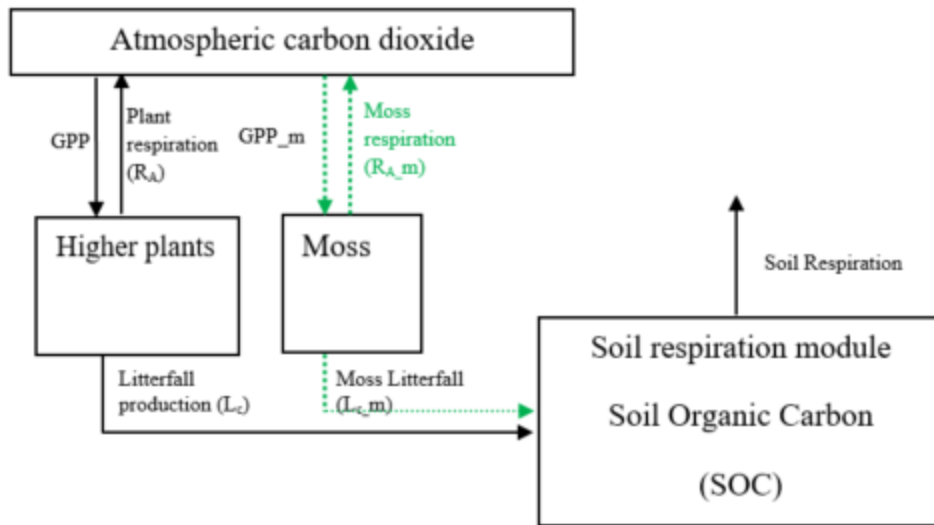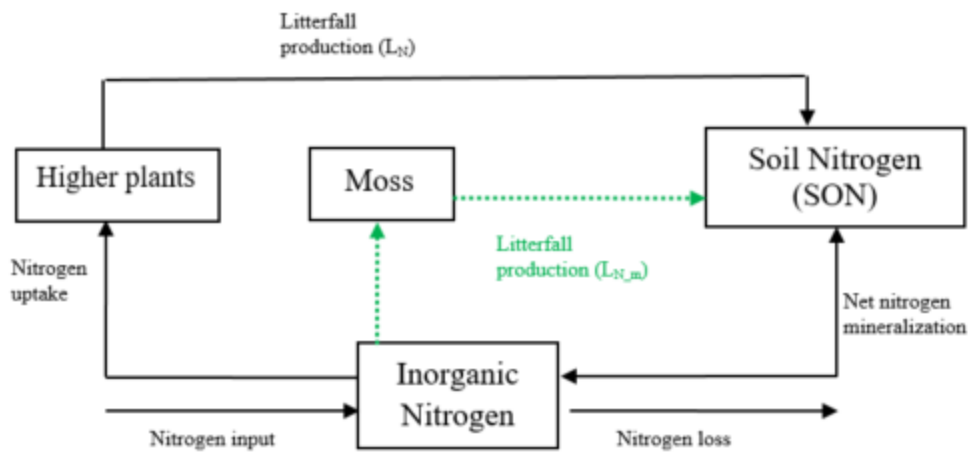

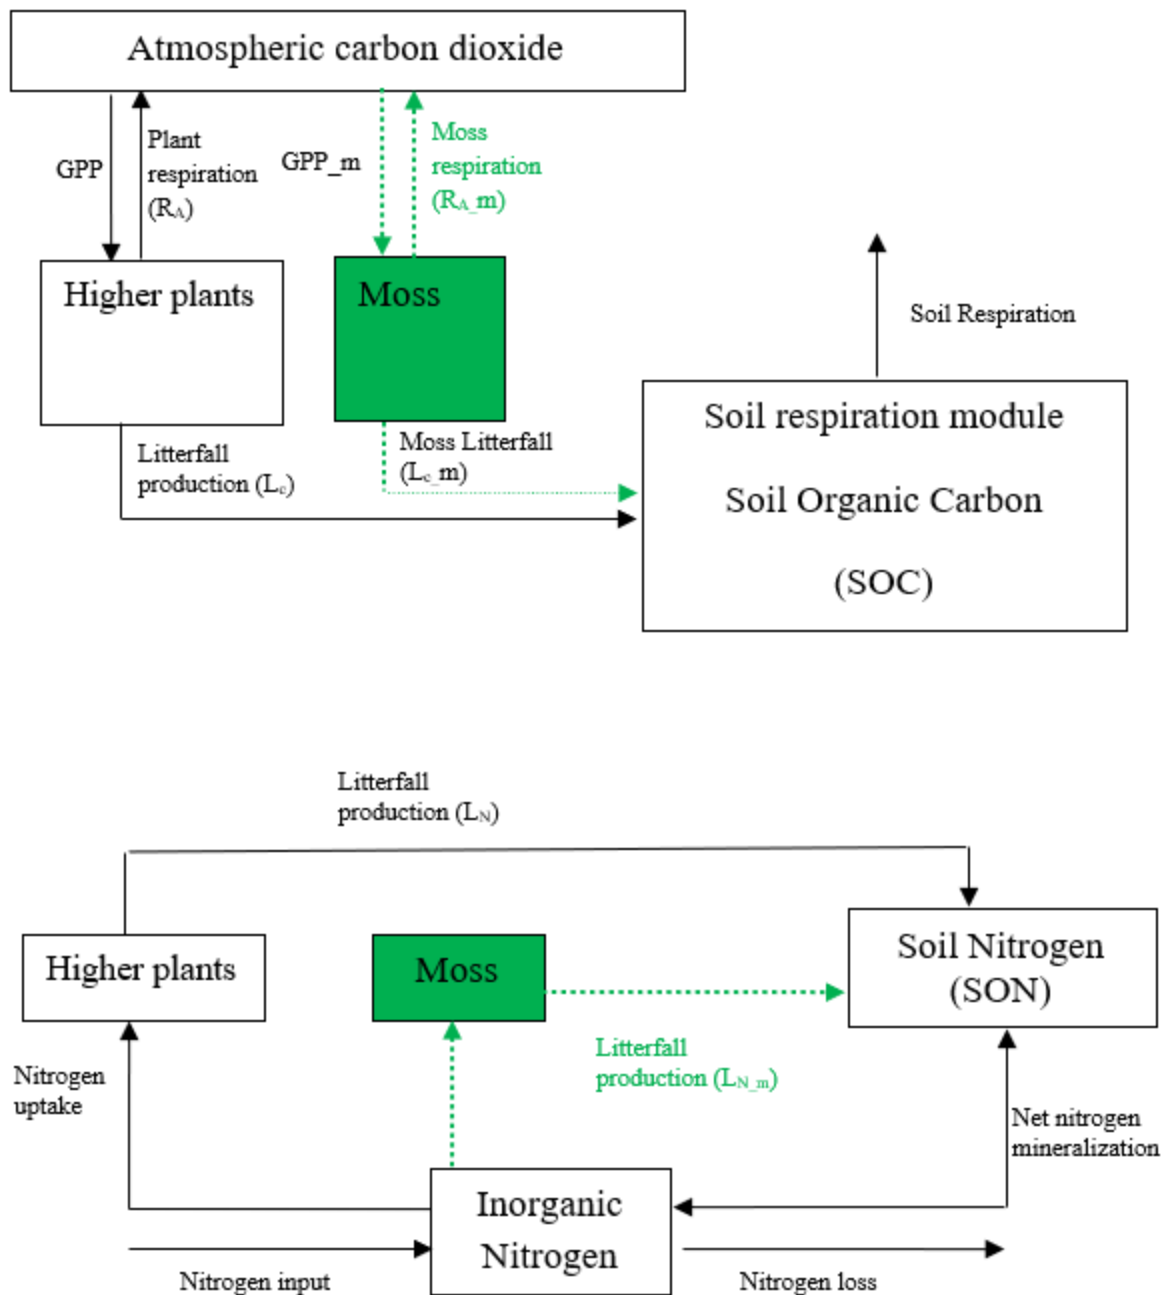

Figure 1. Schematic diagram of TEM\_Moss: Green dashed arrows are new carbon and nitrogen fluxes, representing moss production, moss respiration and litterfall of moss. Black arrows were in TEM 5.0 (Zhuang et al., 2013).

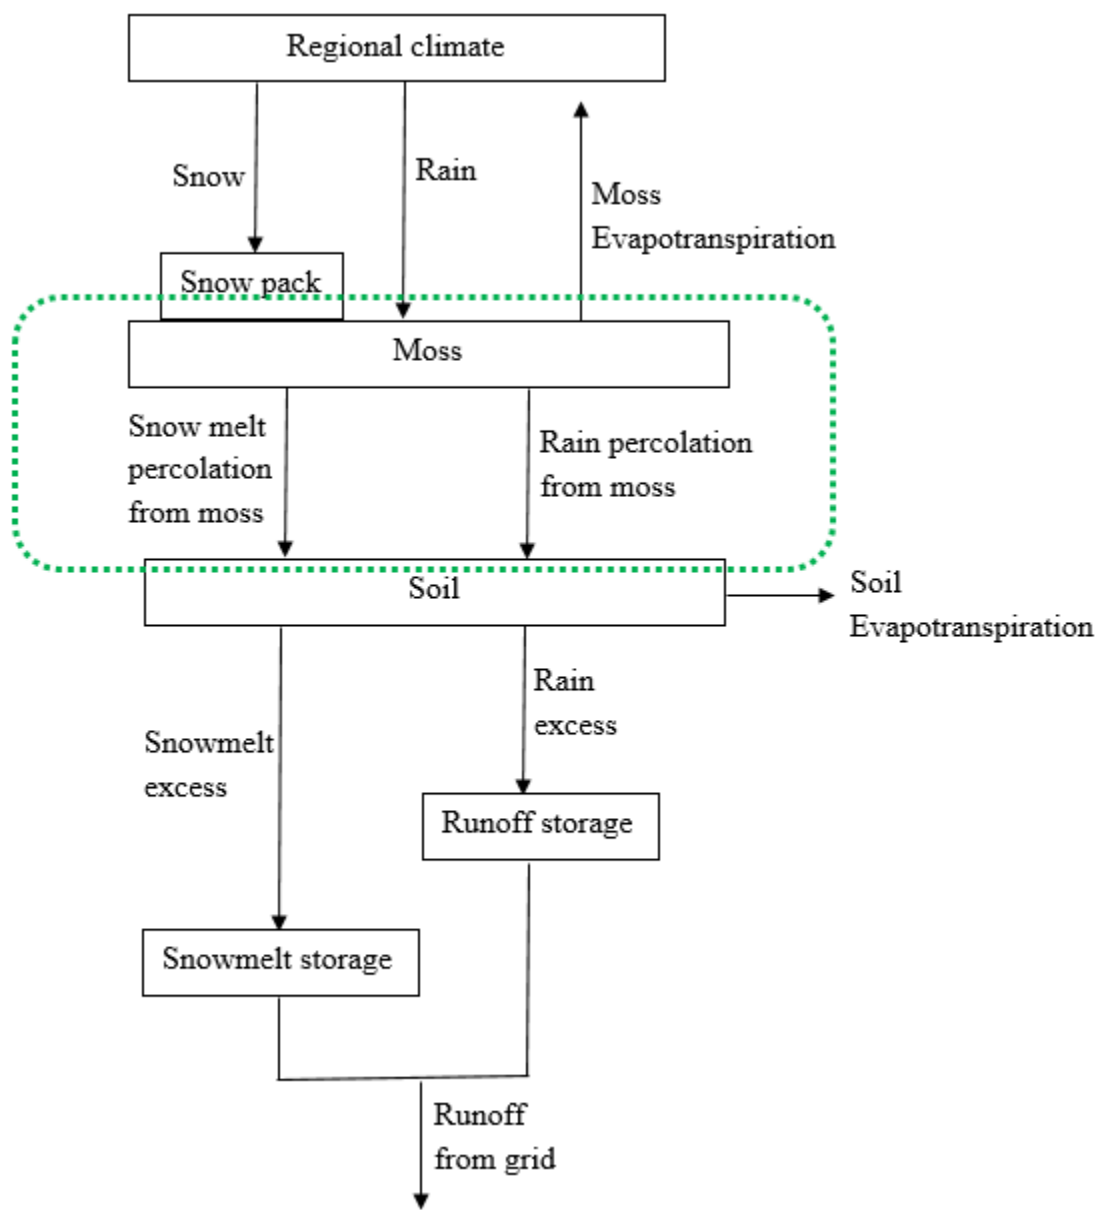

Figure 2. The revised Water Balance Model: Green dashed circle represents the hydrology dynamics for moss (Vörösmarty et al., 1989).



841

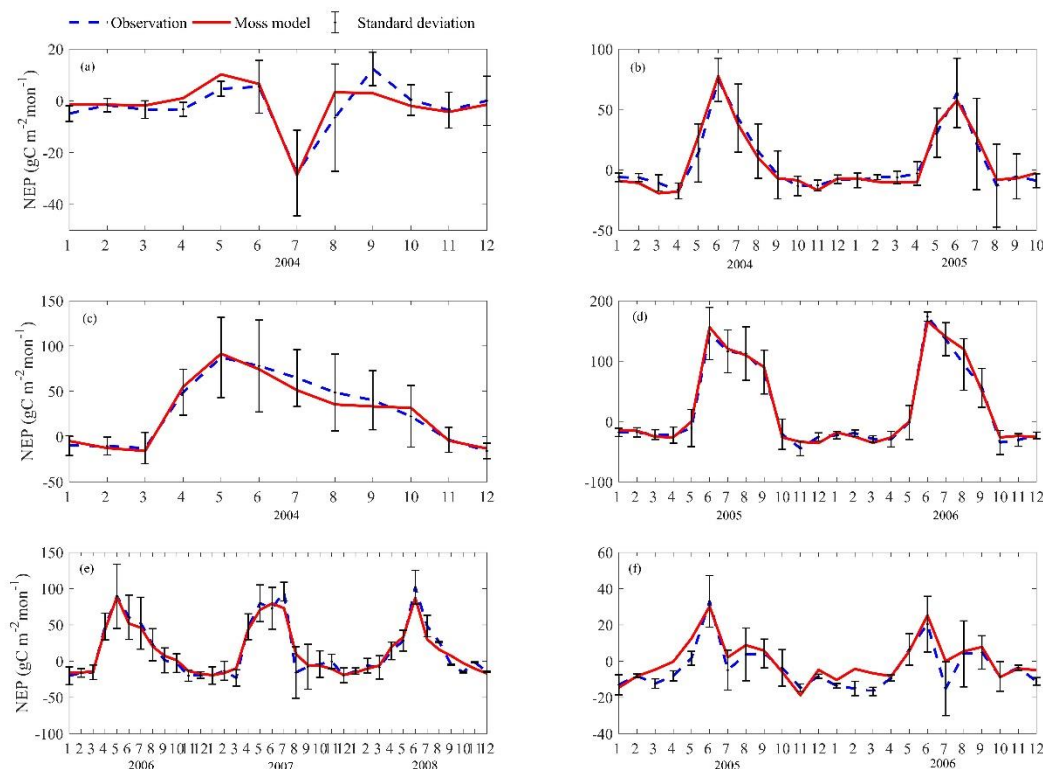

842

843

844 Figure 3. Comparison between observed and simulated NEP ( $\text{gC m}^{-2}\text{mon}^{-1}$ ) at: (a) Ivotuk (alpine  
 845 tundra), (b) UCI-1964 burn site (boreal forest), (c) Howland Forest (main tower) (temperate  
 846 coniferous forest), (d) Univ. of Mich. Biological Station (Temperate deciduous forest), (e)  
 847 KUOM Turfgrass Field (Grassland), and (f) Atqasuk (Wet tundra). Note: scales are different.  
 848 Error bars represent standard errors among daily measure data in one month.

849

850

851

852

853

854

855

856

857

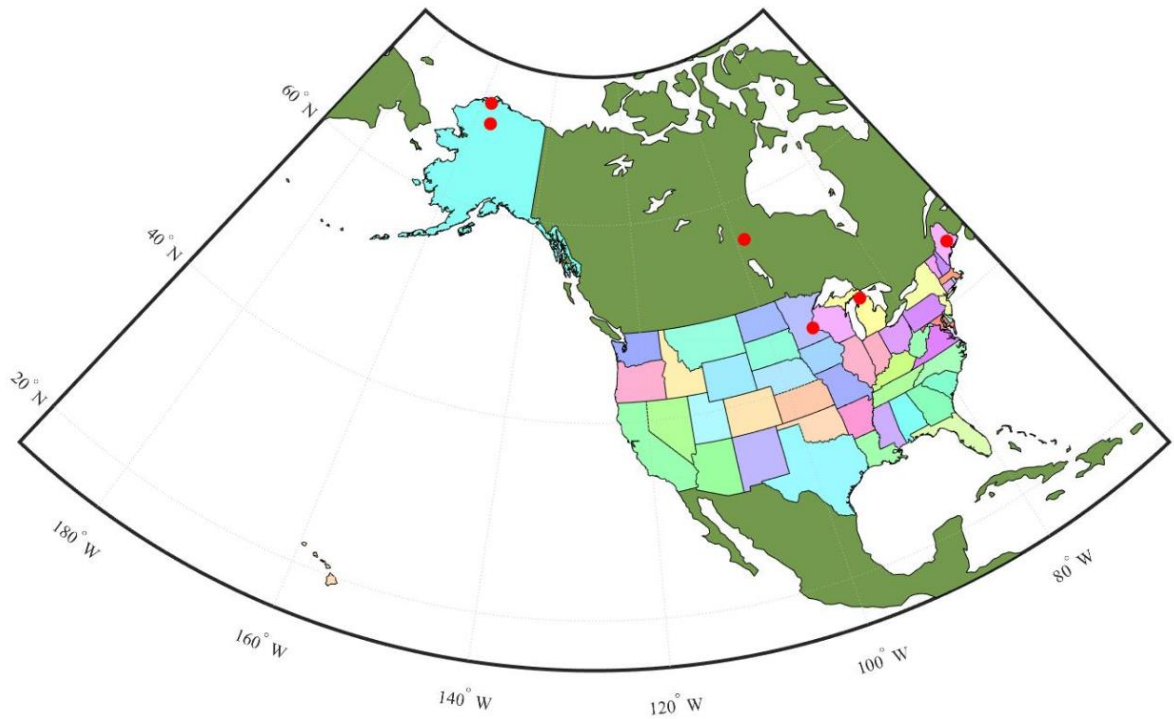

Figure 4. Map showing six sites used for TEM Moss calibration. The red points represent the six sites, which are all in US: US-Ivo: Ivotuk (alpine tundra), CA-NS3: UCI-1964 burn site (boreal forest), US-Ho1: Howland Forest (temperate coniferous forest), US-UMB: Univ. of Mich. Biological Station (temperate deciduous forest), US-KUT: KUOM Turfgrass Field (grassland), US-Atq: Atkasuk (wet tundra).

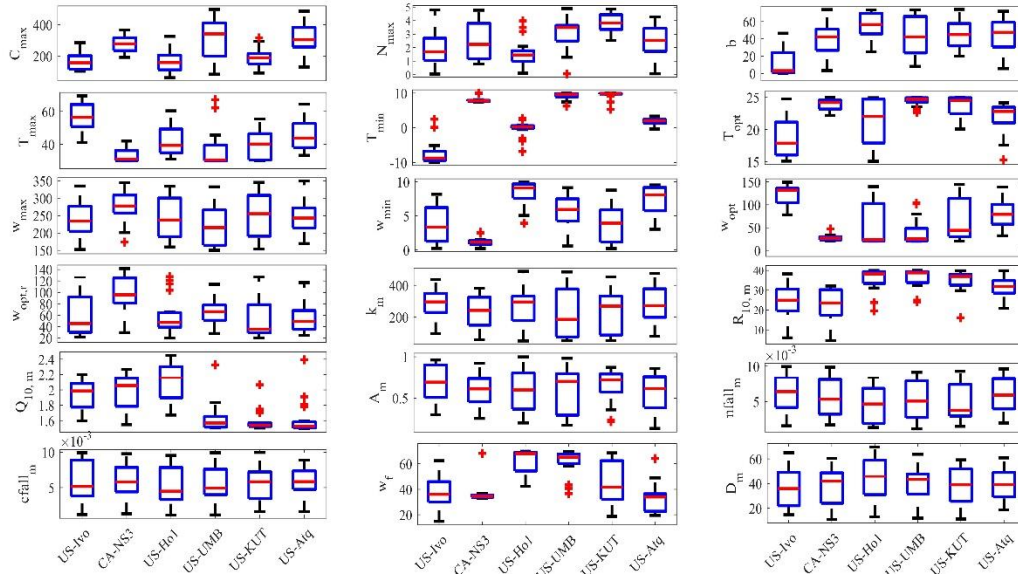

Figure 4. Boxplot of parameter posterior distribution that are obtained after ensemble inverse modeling for TEM\_Moss at all six sites: US-Ivo: Ivotuk (alpine tundra), CA-NS3: UCI-1964 burn site (boreal forest), US-Ho1: Howland Forest (temperate coniferous forest), US-UMB: Univ. of Mich. Biological Station (temperate deciduous forest), US-KUT: KUOM Turfgrass Field (grassland), US-Atq: Atqasuk (wet tundra). Boxes represent the range between the first quartile and the third quartile of the parameter values, the red line within box represents the second quartile or the mean of the values. The bottom and top whiskers represent minimum and maximum parameter values, respectively.

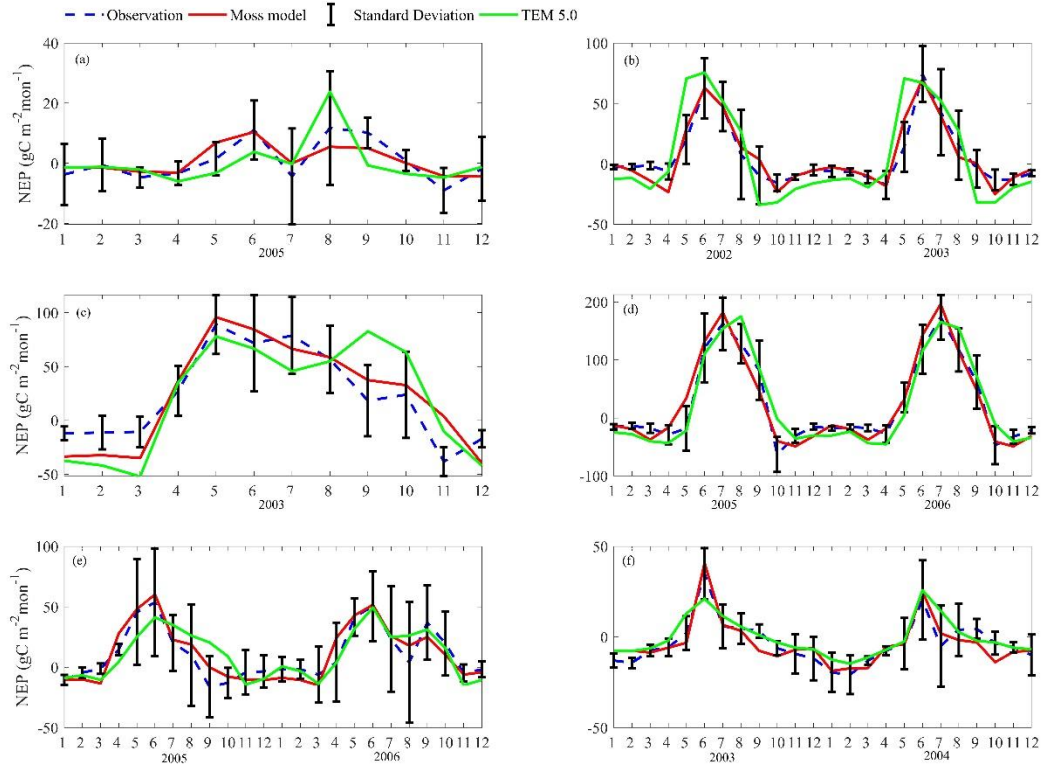

Figure 5. Comparison between observed and simulated NEP ( $\text{gC m}^{-2}\text{mon}^{-1}$ ) at: (a) Ivotuk (alpine tundra), (b) UCI-1964 burn site (boreal forest), (c) Howland Forest (main tower) (temperate coniferous forest), (d) Bartlett Experimental Forest (Temperate deciduous forest), (e) Brookings (Grassland), and (f) Atqasuk (Wet tundra). Note: scales are different.

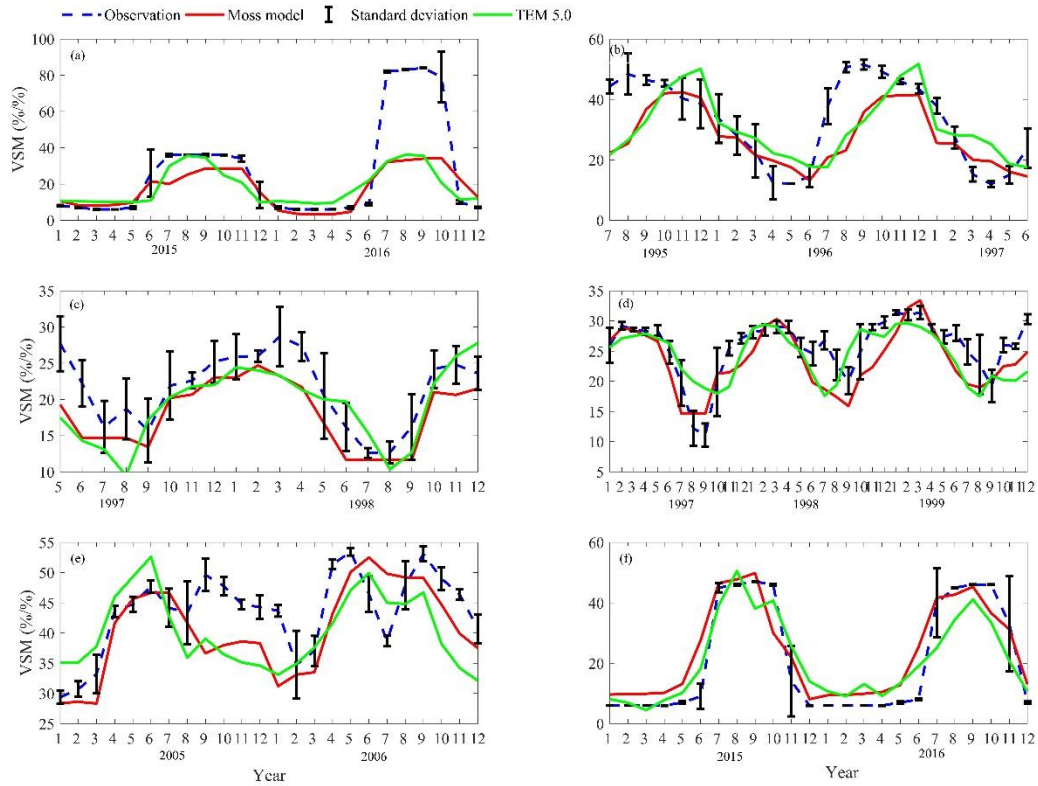

Figure 6. Comparison between observed and simulated volumetric soil moisture (VSM, %/%) at: (a) US-Ivo (alpine tundra), (b) BOREAS NSA-OBS (boreal forest), (c) NL-Loo (temperate coniferous forest), (d) DK-Sor (Temperate deciduous forest), (e) US-Bkg (Grassland), and (f) US-Atq (Wet tundra). Note: scales are different.

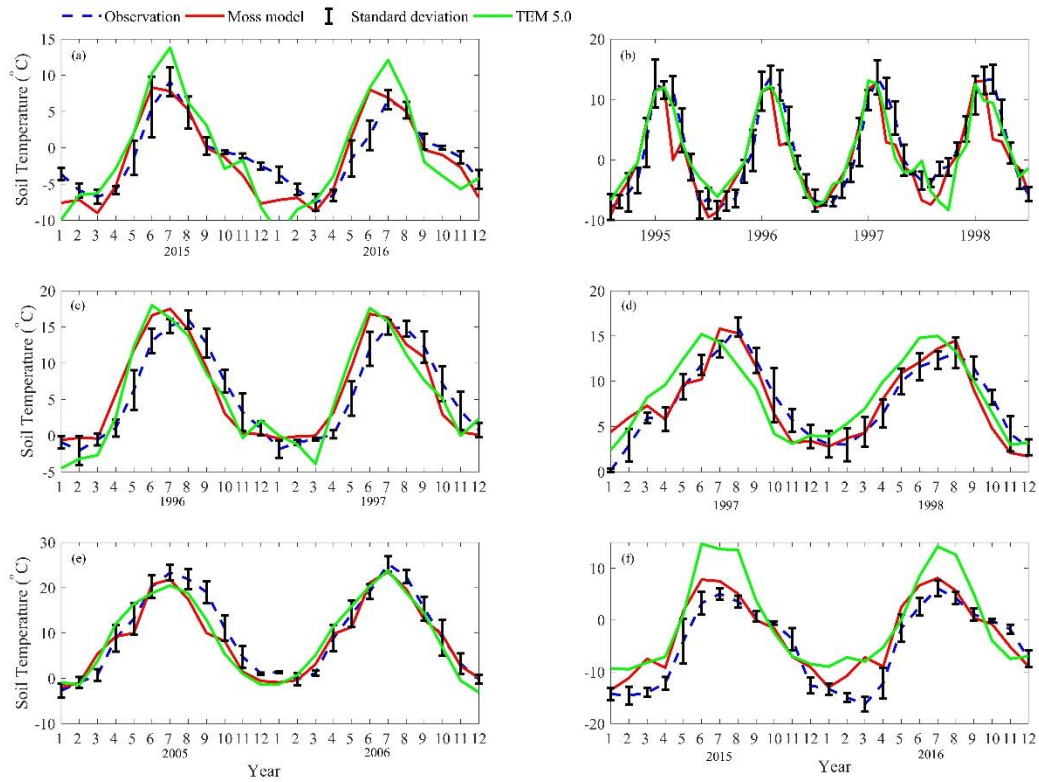

Figure 7. Comparison between observed and simulated soil temperature at 5cm depth (°C) at: (a) US-Ivo (alpine tundra), (b) BOREAS NSA-OBS (boreal forest), (c) US-Ho1 (temperate coniferous forest), (d) BE-Vie (Temperate deciduous forest), (e) US-Bkg (Grassland), and (f) US-Atq (Wet tundra). Note: scales are different.

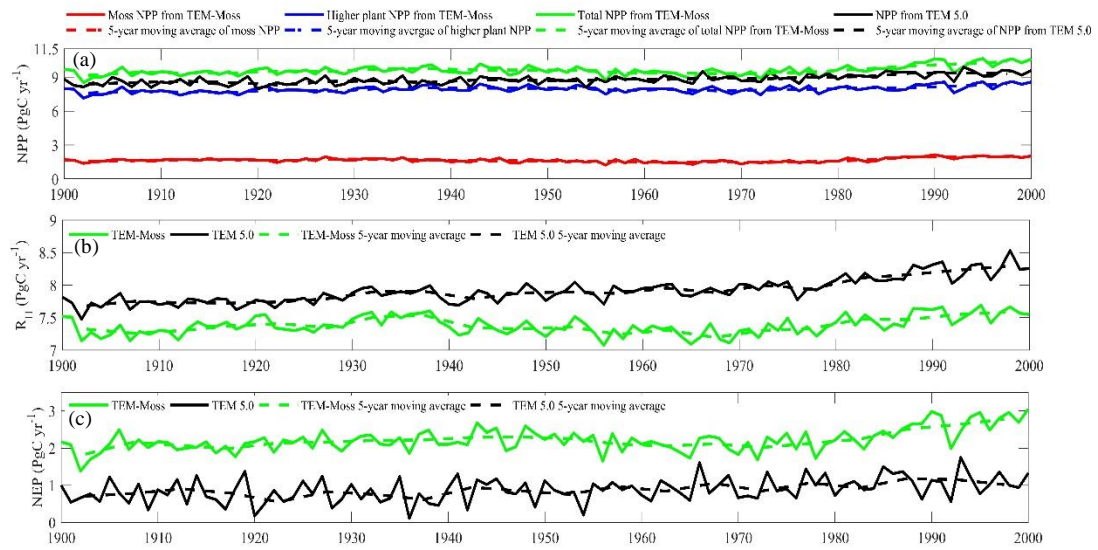

Figure 8. Simulated annual net primary production (NPP, a), heterotrophic respiration ( $R_H$ , b), and net ecosystem production (NEP, c) during the 20<sup>th</sup> century by TEM\_Moss and TEM 5.0.



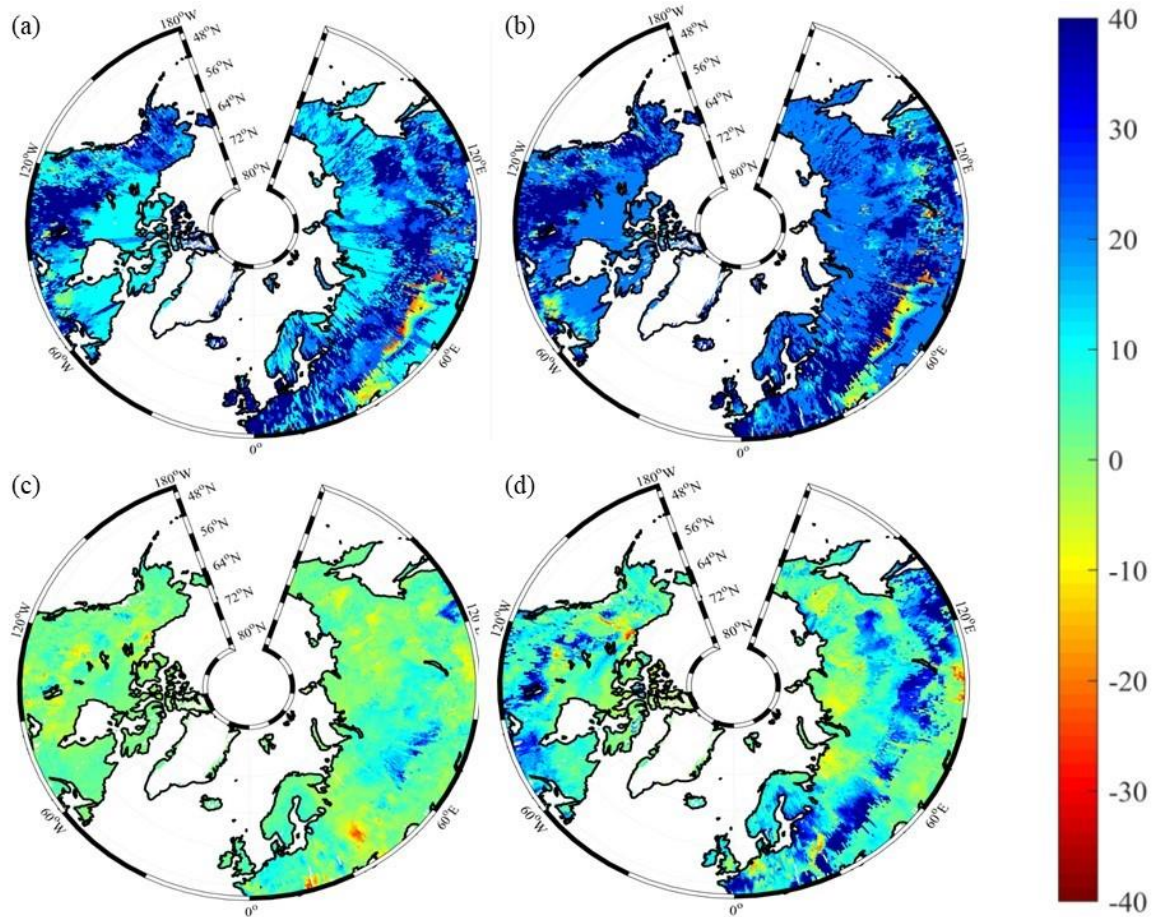

Figure 9. Spatial distribution of NEP simulated by TEM\_Moss for the periods (a) 1900–1950, (b) 1951–2000, and by TEM 5.0 for the periods (c) 1900–1950, (d) 1951–2000. Positive values of NEP represent sinks of CO<sub>2</sub> into terrestrial ecosystems, while negative values represent sources of CO<sub>2</sub> to the atmosphere.



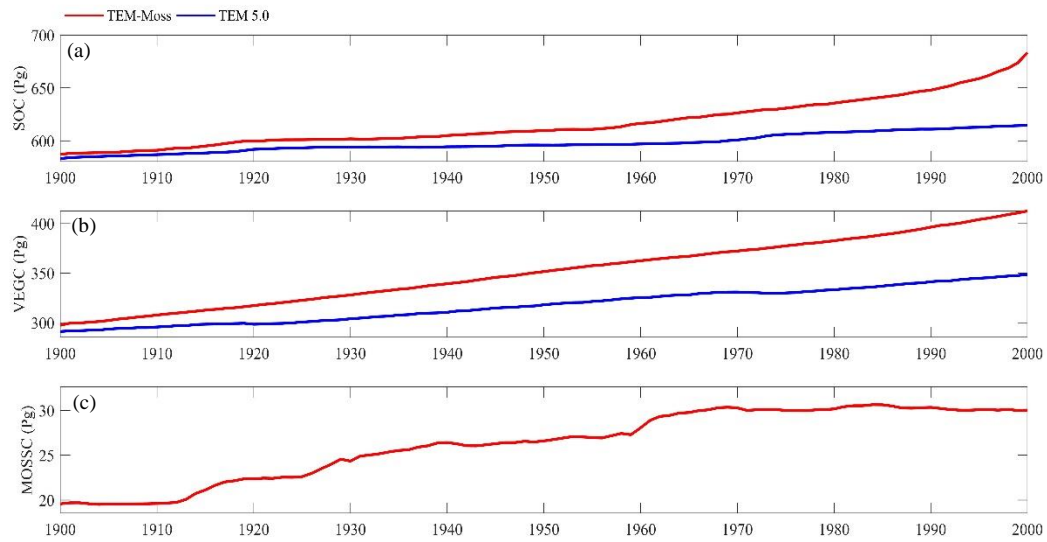

Figure 10. Simulated annual soil organic carbon (SOC, a), vegetation carbon (VEGC, b), and moss carbon (MOSSC, c) during the 20<sup>th</sup> century by TEM\_Moss and TEM 5.0.

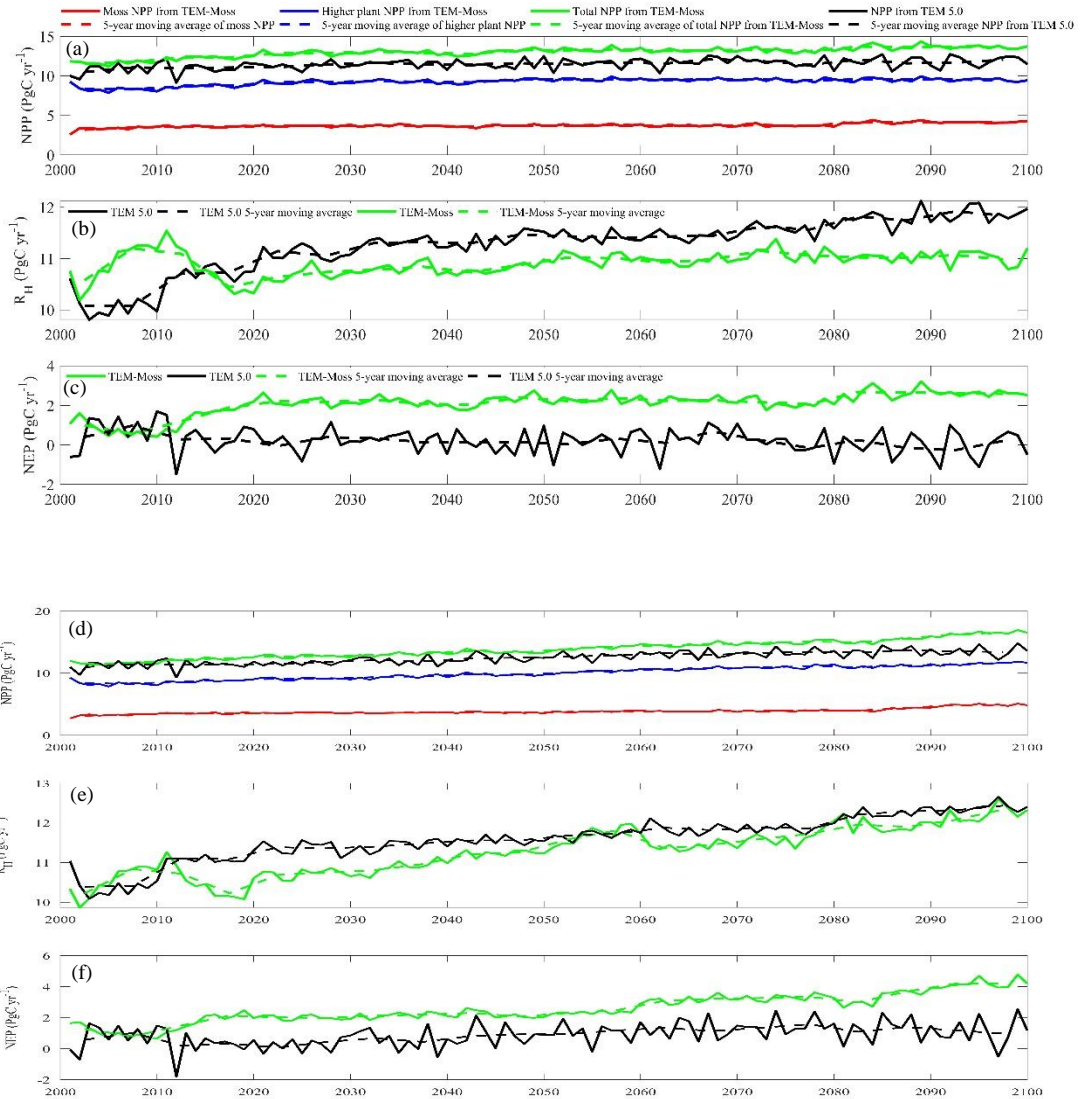

Figure 11. Predicted changes in carbon fluxes: annual net primary production (NPP, (a, d)), heterotrophic respiration ( $R_H$ , (b, e)), and net ecosystem production (NEP, (c, f)) during the 21<sup>st</sup> century under RCP 2.6 scenario (a, b, c, upper panel) and RCP 8.5 scenario (d, e, f, bottom panel) by TEM\_Moss and TEM 5.0.

1010

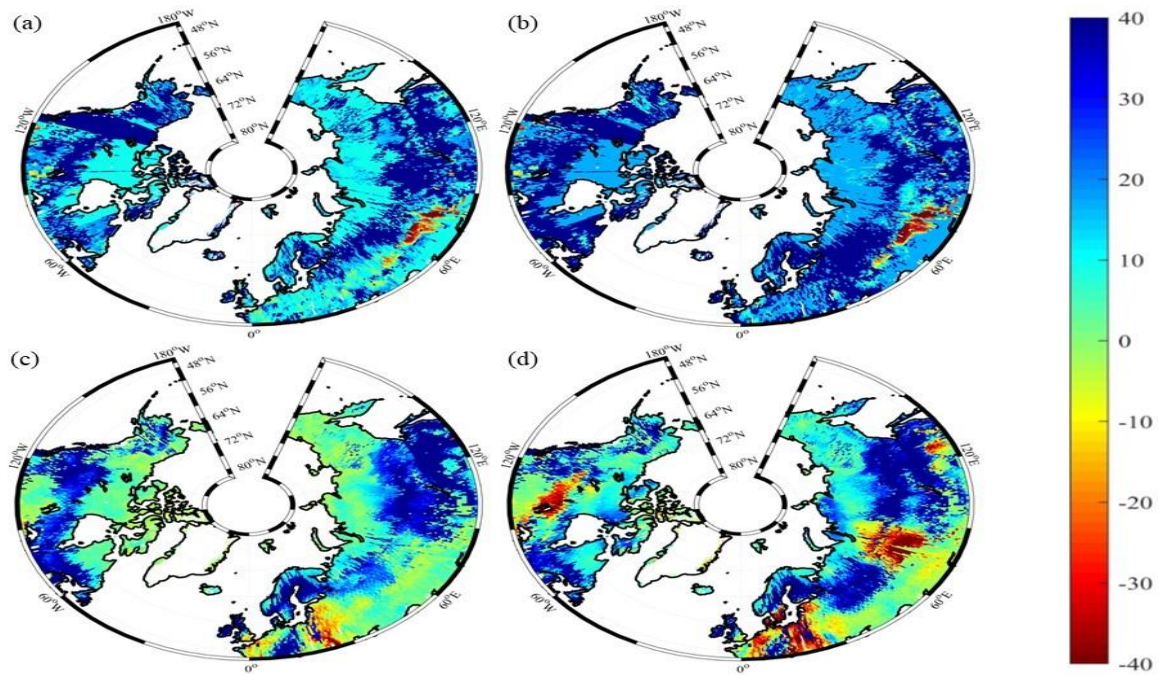

1011

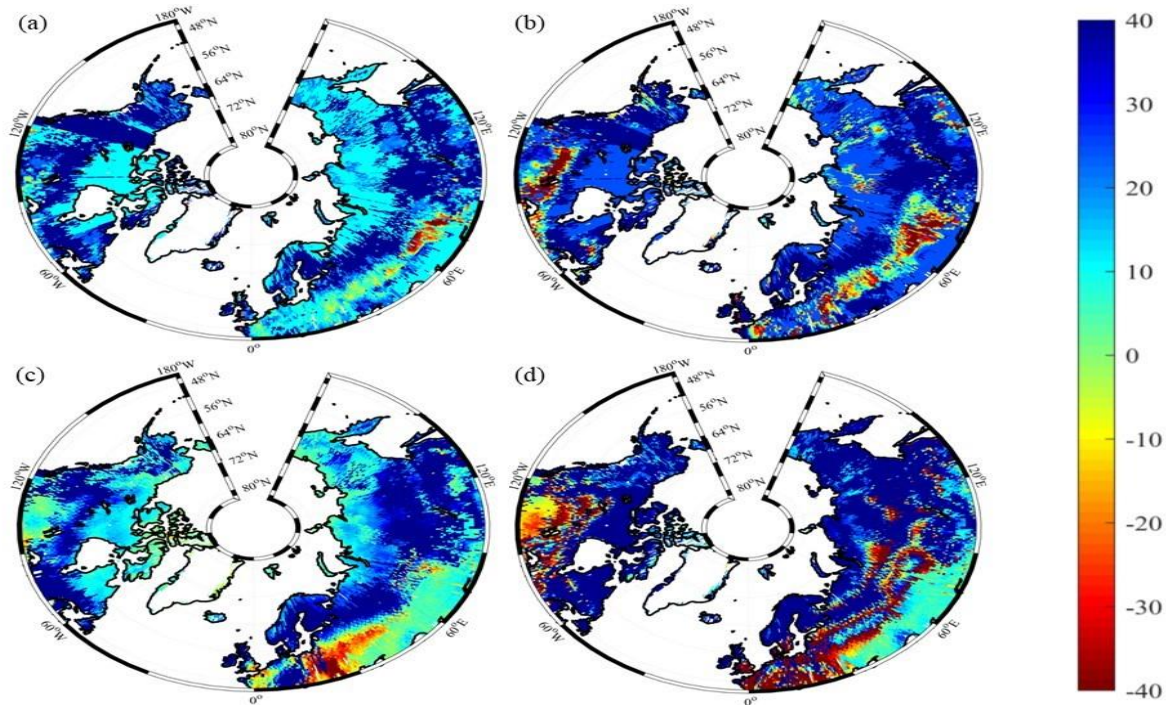

1012

1013

1014

1015

1016

1017

Figure 12. Spatial distribution of NEP simulated for the periods (a) 2000–2050, (b) 2051–2099 by TEM\_Moss, and by TEM 5.0 (c, d) during the 21<sup>st</sup> century under RCP 2.6 scenario (upper panel) and RCP 8.5 scenario (bottom panel). Positive values of NEP represent sinks of CO<sub>2</sub> into terrestrial ecosystems, while negative values represent sources of CO<sub>2</sub> to the atmosphere.

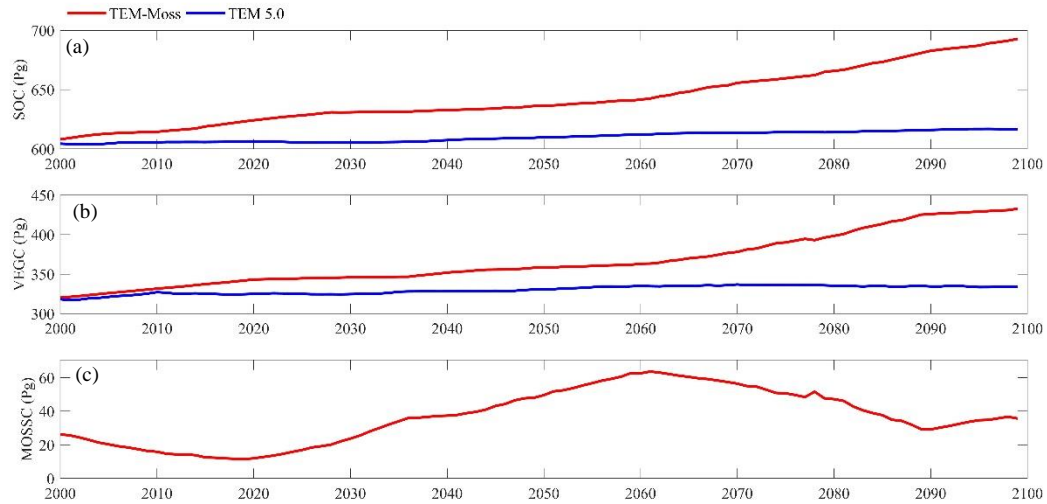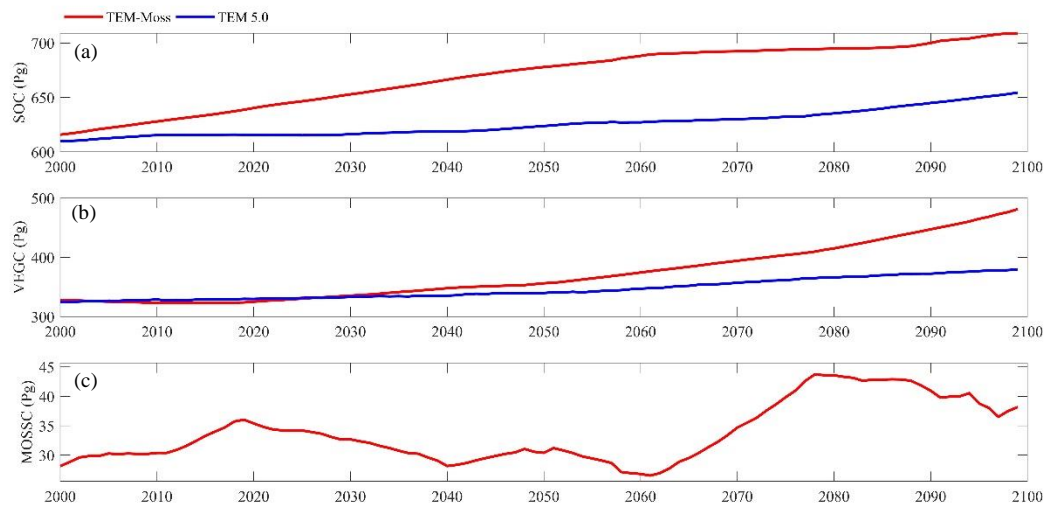

Figure 13. Simulated annual soil organic carbon (SOC, a), vegetation carbon (VEGC, b), and moss carbon (MOSSC, c) during the 21<sup>st</sup> century by TEM\_Moss and TEM 5.0 under RCP 2.6 scenario (upper panel) and RCP 8.5 scenario (bottom panel).



1030 (a)

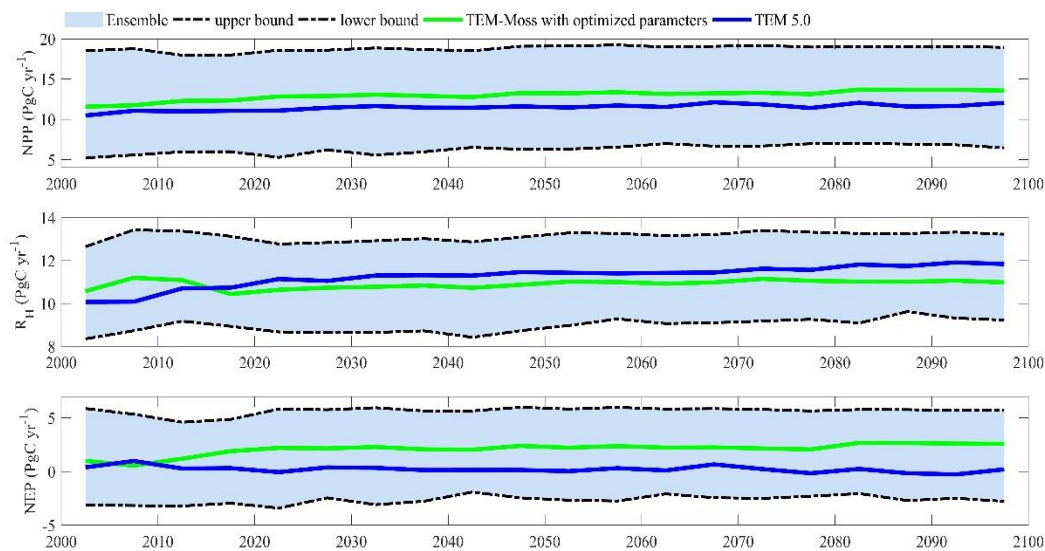

1031

1032 (b)

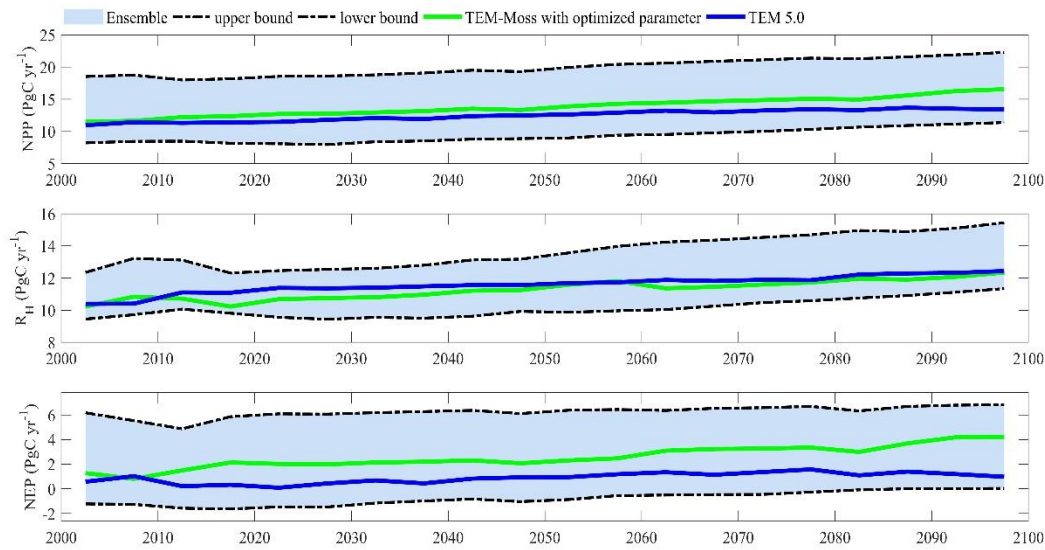

1033  
1034 Figure 14. 5-year moving average plots for carbon fluxes under the (a) RCP 2.6 scenario and (b)  
1035 RCP 8.5 scenario. The blue area represents the upper and lower bounds of simulations.

1036  
1037  
1038

1039 **Table 1. Parameters associated with moss activities in TEM\_Moss**

| Parameters          | Units                                         | descriptions                                          | Parameter range<br>(value) | references                                           |
|---------------------|-----------------------------------------------|-------------------------------------------------------|----------------------------|------------------------------------------------------|
| $C_{\max}$          | $\text{gC m}^{-2} \text{ mon}^{-1}$           | maximum rate of C assimilation                        | [50,500]                   | Launiainen et al. (2015); Williams & Flanagan (1998) |
| $b$                 | $\mu\text{mol m}^{-2} \text{ s}^{-1}$         | Light half-saturation level                           | [5, 150]                   | Launiainen et al. (2015); Raich et al. (1991)        |
| $T_{\min}$          | $^{\circ}\text{C}$                            | minimum temperature                                   | [-10, 10]                  | Frolking et al. (1996); Raich et al. (1991)          |
| $T_{\max}$          | $^{\circ}\text{C}$                            | maximum temperature                                   | [30, 80]                   | Frolking et al. (1996); Raich et al. (1991)          |
| $T_{\text{opt}}$    | $^{\circ}\text{C}$                            | optimal temperature                                   | [15, 30]                   | Frolking et al. (1996); Raich et al. (1991)          |
| $w_{\min}$          | mm                                            | minimum water content for moss photosynthesis         | [0.5, 15]                  | Frolking et al. (1996); Launiainen et al. (2015)     |
| $w_{\max}$          | mm                                            | maximum water content for moss photosynthesis         | [150, 380]                 | Frolking et al. (1996); Launiainen et al. (2015)     |
| $w_{\text{opt}}$    | mm                                            | optimal water content for moss photosynthesis         | [10, 150]                  | Frolking et al. (1996); Zhuang et al. (2002)         |
| $k_m$               | $\mu\text{L/L}$                               | $\text{CO}_2$ concentration half-saturation level     | [50, 500]                  | Zhuang et al. (2002); Raich et al. (1991)            |
| $R_{10, m}$         | $\text{gC m}^{-2} \text{ mon}^{-1}$           | moss respiration rate at 10 $^{\circ}\text{C}$        | [0,40]                     | Frolking et al. (1996); Launiainen et al. (2015)     |
| $Q_{10, m}$         | -                                             | moss respiration temperature sensitivity              | [1.5, 2.5]                 | Frolking et al. (1996); Launiainen et al. (2015)     |
| $w_{\text{opt}, r}$ | mm                                            | optimal water content for moss respiration            | [10, 150]                  | Frolking et al., 1996; Zhuang et al. (2002)          |
| $c_{\text{fall}_m}$ | $\text{g}^{-1}\text{g}^{-1} \text{ mon}^{-1}$ | constant proportion for carbon litterfall from moss   | [0.001, 0.01]              | Zhuang et al. (2002); Raich et al. (1991)            |
| $N_{\max}$          | $\text{gN m}^{-2} \text{ mon}^{-1}$           | maximum rate of N uptake by mosses                    | [0.1,5]                    | Zhuang et al. (2002); Raich et al. (1991)            |
| $k_n$               | $\text{g m}^{-2}$                             | Half-saturation constant for N uptake by moss         | 1.0                        | Zhuang et al. (2002); Raich et al. (1991)            |
| $A_m$               | -                                             | relative allocation of effort to C vs. N uptake       | [0,1]                      | Raich et al. (1991)                                  |
| $w_f$               | mm                                            | moss field capacity                                   | [10, 80]                   | Frolking et al. (1996); Raich et al. (1991)          |
| $n_{\text{fall}_m}$ | $\text{g}^{-1}\text{g}^{-1} \text{ mon}^{-1}$ | constant proportion for nitrogen litterfall from moss | [0.001, 0.01]              | Zhuang et al. (2002); Raich et al. (1991)            |
| $D_m$               | mm                                            | Moss thickness                                        | [0, 100]                   | Zhuang et al. (2002)                                 |

**Table 2. Site description and measured NEP data used to calibrate TEM\_Moss**

| Site Name                               | Location<br>(Longitude<br>(degrees)<br>/Latitude<br>(degrees)) | Elevation<br>(m) | Vegetation<br>type                | Description                                                                                                                                       | Data range          | Citations              |
|-----------------------------------------|----------------------------------------------------------------|------------------|-----------------------------------|---------------------------------------------------------------------------------------------------------------------------------------------------|---------------------|------------------------|
| Univ. of Mich.<br>Biological<br>Station | 84.71W<br>45.56 N                                              | 234              | Temperate<br>deciduous<br>forest  | Located within a protected forest owned by the University of Michigan. Mean annual temperature is 5.83° C with mean annual precipitation of 803mm | 01/2005-<br>12/2006 | Gough et al. (2013)    |
| Howland Forest<br>(main tower)          | 68.74W<br>45.20N                                               | 60               | Temperate<br>coniferous<br>forest | Closed coniferous forest, minimal disturbance.                                                                                                    | 01/2004-<br>12/2004 | Davidson et al. (2006) |
| UCI-1964 burn<br>site                   | 98.38W<br>55.91N                                               | 260              | Boreal forest                     | Located in a continental boreal forest, dominated by black spruce trees, within the BOREAS northern study area in central Manitoba, Canada.       | 01/2004-<br>10/2005 | Goulden et al. (2006)  |
| KUOM Turfgrass<br>Field                 | 93.19W<br>45.0N                                                | 301              | Grassland                         | A low-maintenance lawn consisting of cool-season turfgrasses.                                                                                     | 01/2006-<br>12/2008 | Hiller et al. (2010)   |
| Atqasuk                                 | 157.41W<br>70.47N                                              | 15               | Wet tundra                        | 100 km south of Barrow, Alaska. Variety of moist-wet coastal sedge tundra, and moist-tussock tundra surfaces in the more well-drained upland.     | 01/2005-<br>12/2006 | Oechel et al. (2014);  |
| Ivotuk                                  | 155.75W<br>68.49N                                              | 568              | Alpine tundra                     | 300 km south of Barrow and is located at the foothill of the Brooks Range and is classified as tussock sedge, dwarf-shrub, moss tundra.           | 01/2004-<br>12/2004 | McEwing et al. (2015)  |

**Table 3. Site description and measured NEP data used to validate TEM\_Moss**

| Site Name                       | Location<br>(Longitude<br>(degrees)<br>/Latitude<br>(degrees)) | Elevation<br>(m) | Vegetation<br>type                | Description                                                                                                                                                                                                            | Data range          | Citations                                           |
|---------------------------------|----------------------------------------------------------------|------------------|-----------------------------------|------------------------------------------------------------------------------------------------------------------------------------------------------------------------------------------------------------------------|---------------------|-----------------------------------------------------|
| Bartlett<br>Experimental Forest | 71.29W/<br>44.06N                                              | 272              | Temperate<br>deciduous<br>forest  | Located within the White Mountains National Forest in north-central New Hampshire, USA, with mean annual temperature of 5.61 °C and mean annual precipitation of 1246mm.                                               | 01/2005-<br>12/2006 | Jenkins et al. (2007);<br>Richardson et al. (2007); |
| Howland Forest<br>(main tower)  | 68.74W/<br>45.20N                                              | 60               | Temperate<br>coniferous<br>forest | Closed coniferous forest, minimal disturbance.                                                                                                                                                                         | 01/2003-<br>12/2003 | Davidson et al. (2006)                              |
| UCI-1964 burn site              | 98.38W/<br>55.91N                                              | 260              | Boreal forest                     | Located in a continental boreal forest, dominated by black spruce trees, within the BOREAS northern study area in central Manitoba, Canada.                                                                            | 01/2002-<br>12/2003 | Goulden et al. (2006)                               |
| Brookings                       | 96.84W/<br>44.35N                                              | 510              | Grassland                         | Located in a private pasture, belonging to the Northern Great Plains Rangelands, the grassland is representative of many in the north central United States, with seasonal winter conditions and a wet growing season. | 01/2005-<br>12/2006 | Gilmanov et al. (2005)                              |
| Atqasuk                         | 157.41W/<br>70.47N                                             | 15               | Wet tundra                        | 100 km south of Barrow, Alaska. Variety of moist-wet coastal sedge tundra, and moist-tussock tundra surfaces in the more well-drained upland.                                                                          | 01/2003-<br>12/2004 | Oechel et al. (2014);                               |
| Ivotuk                          | 155.75W/<br>68.49N                                             | 568              | Alpine tundra                     | 300 km south of Barrow and is located at the foothill of the Brooks Range and is classified as tussock sedge, dwarf-shrub, moss tundra.                                                                                | 01/2005-<br>12/2005 | McEwing et al. (2015)                               |



**Table 4. Site description and measured volumetric soil moisture data used to validate TEM\_Moss**

| Site              | Location<br>(Longitude (degrees)<br>/Latitude (degrees)) | Elevation<br>(m) | Vegetation type                | Data range          | Citations               |
|-------------------|----------------------------------------------------------|------------------|--------------------------------|---------------------|-------------------------|
| US-Ivo            | 155.75W/<br>68.49N                                       | 579              | Alpine tundra                  | 01/2015-<br>12/2016 | Oechel & Kalhori (2018) |
| BOREAS<br>NSA-OBS | 98.48W/<br>55.88N                                        | 259              | Boreal forest                  | 07/1995-<br>06/1997 | Stangel & Kelly (1999)  |
| NL-Loo            | 5.74E/<br>52.17N                                         | 25               | Temperate coniferous<br>forest | 05/1997-<br>12/1998 | Falge et al. (2005)     |
| DK-Sor            | 11.64E/<br>55.49N                                        | 40               | Temperate deciduous<br>forest  | 01/1997-<br>12/1999 | Falge et al. (2005)     |
| US-Bkg            | 96.84W/<br>44.35N                                        | 510              | Grasslands                     | 01/2005-<br>12/2006 | Gilmanov et al. (2005)  |
| US-Atq            | 157.41W/<br>70.47N                                       | 25               | Wet tundra                     | 01/2015-<br>12/2016 | Oechel & Kalhori (2018) |

**Table 5. Site description and measured soil temperature at 5cm depth data used to validate TEM\_Moss**

| Site              | Location<br>(Longitude (degrees)<br>/Latitude (degrees)) | Elevation<br>(m) | Vegetation type                | Data range          | Citations               |
|-------------------|----------------------------------------------------------|------------------|--------------------------------|---------------------|-------------------------|
| US-Ivo            | 155.75W/<br>68.49N                                       | 579              | Alpine tundra                  | 01/2015-<br>12/2016 | Oechel & Kalhori (2018) |
| BOREAS<br>NSA-OBS | 98.48W/<br>55.88N                                        | 259              | Boreal forest                  | 01/1995-<br>12/1998 | Stangel & Kelly (1999)  |
| US-Ho1            | 68.74W/<br>45.2N                                         | 60               | Temperate coniferous<br>forest | 01/1996-<br>12/1997 | Falge et al. (2005)     |
| BE-Vie            | 6.0E/<br>50.3N                                           | 493              | Temperate deciduous<br>forest  | 01/1997-<br>12/1998 | Falge et al. (2005)     |
| US-Bkg            | 96.84W/<br>44.35N                                        | 510              | Grasslands                     | 01/2005-<br>12/2006 | Gilmanov et al. (2005)  |
| US-Atq            | 157.41W/<br>70.47N                                       | 25               | Wet tundra                     | 01/2015-<br>12/2016 | Oechel & Kalhori (2018) |

**Table 6. Model validation statistics for TEM\_Moss and TEM 5.0 at six sites with NEP data**

| Site Name                      | Vegetation type             | Models   | Intercept | Slope | R-square | Adjusted R-square | RMSE  | p-value |
|--------------------------------|-----------------------------|----------|-----------|-------|----------|-------------------|-------|---------|
| Ivotuk                         | Alpine tundra               | TEM_Moss | 0.46      | 0.61  | 0.72     | 0.70              | 3.57  | <0.001  |
|                                |                             | TEM 5.0  | -0.22     | 0.75  | 0.43     | 0.41              | 5.88  | 0.02    |
| UCI-1964 burn site             | Boreal forest               | TEM_Moss | -0.13     | 1.01  | 0.91     | 0.90              | 8.33  | <0.001  |
|                                |                             | TEM 5.0  | -2.45     | 1.29  | 0.75     | 0.74              | 20.1  | <0.001  |
| Howland Forest<br>(main tower) | Temperate coniferous forest | TEM_Moss | -1.28     | 1.05  | 0.83     | 0.81              | 19.69 | <0.001  |
|                                |                             | TEM 5.0  | -2.22     | 0.97  | 0.62     | 0.61              | 31.23 | 0.002   |
| Bartlett Experimental Forest   | Temperate deciduous forest  | TEM_Moss | -0.49     | 1.03  | 0.94     | 0.94              | 19.06 | <0.001  |
|                                |                             | TEM 5.0  | -2.49     | 1.04  | 0.91     | 0.89              | 23    | <0.001  |
| Brookings                      | Grassland                   | TEM_Moss | 0.36      | 1.02  | 0.85     | 0.84              | 8.95  | <0.001  |
|                                |                             | TEM 5.0  | 2.58      | 0.75  | 0.62     | 0.6               | 13.07 | <0.001  |
| Atqasuk                        | Wet tundra                  | TEM_Moss | -0.36     | 0.97  | 0.84     | 0.83              | 5.13  | <0.001  |
|                                |                             | TEM 5.0  | 1.99      | 0.75  | 0.75     | 0.74              | 6.56  | <0.001  |

**Table 7. Model validation statistics for TEM\_Moss and TEM 5.0 at six sites with volumetric soil moisture data**

| Site ID           | Vegetation type                | Models   | Intercept | Slope | R-square | Adjusted R-square | RMSE  | p-value |
|-------------------|--------------------------------|----------|-----------|-------|----------|-------------------|-------|---------|
| US-Ivo            | Alpine tundra                  | TEM_Moss | 8.56      | 0.34  | 0.74     | 0.72              | 20.8  | <0.001  |
|                   |                                | TEM 5.0  | 10.67     | 0.29  | 0.64     | 0.62              | 21.76 | <0.001  |
| BOREAS<br>NSA-OBS | Boreal forest                  | TEM_Moss | 10.71     | 0.51  | 0.52     | 0.51              | 11.1  | <0.001  |
|                   |                                | TEM 5.0  | 16.47     | 0.43  | 0.32     | 0.31              | 11.96 | <0.001  |
| NL-Loo            | Temperate<br>coniferous forest | TEM_Moss | 0.47      | 0.82  | 0.83     | 0.81              | 4.0   | <0.001  |
|                   |                                | TEM 5.0  | 3.75      | 0.72  | 0.49     | 0.48              | 4.5   | <0.001  |
| DK-Sor            | Temperate<br>deciduous forest  | TEM_Moss | 1.39      | 0.86  | 0.67     | 0.65              | 3.65  | <0.001  |
|                   |                                | TEM 5.0  | 10.41     | 0.54  | 0.4      | 0.39              | 4.06  | <0.001  |
| US-Bkg            | Grassland                      | TEM_Moss | 5.64      | 0.8   | 0.51     | 0.49              | 6.05  | <0.001  |
|                   |                                | TEM 5.0  | 22.24     | 0.41  | 0.21     | 0.2               | 7.34  | 0.027   |
| US-Atq            | Wet tundra                     | TEM_Moss | 7.76      | 0.77  | 0.87     | 0.85              | 7.38  | <0.001  |
|                   |                                | TEM 5.0  | 6.74      | 0.68  | 0.85     | 0.84              | 7.63  | <0.001  |

**Table 8. Model validation statistics for TEM\_Moss and TEM 5.0 at six sites with soil temperature at 5cm depth data**

| Site ID           | Vegetation type                | Models   | Intercept | Slope | R-square | Adjusted R-square | RMSE | p-value |
|-------------------|--------------------------------|----------|-----------|-------|----------|-------------------|------|---------|
| US-Ivo            | Alpine tundra                  | TEM_Moss | -0.34     | 1.16  | 0.83     | 0.82              | 2.54 | <0.001  |
|                   |                                | TEM 5.0  | 0.54      | 1.36  | 0.75     | 0.73              | 3.94 | <0.001  |
| BOREAS<br>NSA-OBS | Boreal forest                  | TEM_Moss | -0.05     | 0.91  | 0.9      | 0.88              | 2.24 | <0.001  |
|                   |                                | TEM 5.0  | 0.27      | 0.81  | 0.84     | 0.82              | 2.9  | <0.001  |
| US-Ho1            | Temperate<br>coniferous forest | TEM_Moss | 0.7       | 0.95  | 0.81     | 0.79              | 2.93 | <0.001  |
|                   |                                | TEM 5.0  | -0.06     | 0.99  | 0.77     | 0.76              | 3.41 | <0.001  |
| BE-Vie            | Temperate<br>deciduous forest  | TEM_Moss | 0.57      | 0.92  | 0.83     | 0.81              | 1.82 | <0.001  |
|                   |                                | TEM 5.0  | 1.88      | 0.85  | 0.69     | 0.68              | 2.56 | <0.001  |
| US-Bkg            | Grassland                      | TEM_Moss | 0.17      | 0.87  | 0.91     | 0.89              | 2.87 | <0.001  |
|                   |                                | TEM 5.0  | -0.01     | 0.91  | 0.89     | 0.87              | 3.04 | <0.001  |
| US-Atq            | Wet tundra                     | TEM_Moss | 1.36      | 0.86  | 0.84     | 0.82              | 3.63 | <0.001  |
|                   |                                | TEM 5.0  | 4.33      | 0.99  | 0.75     | 0.74              | 6.17 | <0.001  |

**Table 9. Average annual NPP,  $R_H$  and NEP (as Pg C per year) during the 20<sup>th</sup> century estimated by two models.**

| Average annual carbon fluxes (PgC yr <sup>-1</sup> ) |                                                                                | TEM_Moss | TEM 5.0 | Difference | Moss NPP/<br><del>Higher</del><br><del>plant</del> <u>Vascular</u><br><del>plants</del> NPP |
|------------------------------------------------------|--------------------------------------------------------------------------------|----------|---------|------------|---------------------------------------------------------------------------------------------|
| NPP                                                  | Moss NPP                                                                       | 1.69     | -       | -          | 21.3%                                                                                       |
|                                                      | <del>Higher</del><br><del>plant</del> <u>Vascular</u><br><del>plants</del> NPP | 7.93     | 8.8     | -          |                                                                                             |
|                                                      | Total NPP                                                                      | 9.6      | 8.8     | 0.8        |                                                                                             |
| $R_H$                                                |                                                                                | 7.38     | 7.91    | -0.53      |                                                                                             |
| NEP                                                  |                                                                                | 2.22     | 0.89    | 1.33       |                                                                                             |

**Table 10. Increasing of SOC, vegetation carbon (VGC), and moss carbon (MOSSC) from 1900 to 2000, and total carbon storage during the 20<sup>th</sup> century predicted by two models.**

| Models   | Carbon pools | Carbon pool amounts in<br>1900/2000 (units: Pg) | Changes in carbon pools during<br>the 20 <sup>th</sup> century (units: Pg) |
|----------|--------------|-------------------------------------------------|----------------------------------------------------------------------------|
| TEM_Moss | SOC          | 587.1/683.4                                     | 96.3                                                                       |
|          | VEGC         | 297.5/412.7                                     | 115.2                                                                      |
|          | MOSSC        | 19.6/30                                         | 10.4                                                                       |
|          | Total        | 904.2/1126.1                                    | 221.9                                                                      |
| TEM 5.0  | SOC          | 583.2/614.9                                     | 31.7                                                                       |
|          | VEGC         | 291.1/348.6                                     | 57.5                                                                       |
|          | Total        | 874.3/963.5                                     | 89.2                                                                       |

**Table 11. Average annual NPP,  $R_H$  and NEP (as Pg C per year) during the 21<sup>st</sup> century estimated by two models under (a) RCP 8.5 scenario and (b) RCP 2.6 scenario.**

**(a)**

| Average annual carbon fluxes (PgC yr <sup>-1</sup> ) |                                                                | TEM_Moss | TEM 5.0 | Difference | Moss NPP/<br><del>Higher</del><br><u>plantVascular</u><br><u>plants</u> NPP |
|------------------------------------------------------|----------------------------------------------------------------|----------|---------|------------|-----------------------------------------------------------------------------|
| NPP                                                  | Moss NPP                                                       | 3.84     | -       | -          | 38.4%                                                                       |
|                                                      | <del>Higher</del><br><u>plantVascular</u><br><u>plants</u> NPP | 10       | 12.53   | -          |                                                                             |
|                                                      | Total NPP                                                      | 13.84    | 12.53   | 1.31       |                                                                             |
| $R_H$                                                |                                                                | 11.28    | 11.54   | -0.21      |                                                                             |
| NEP                                                  |                                                                | 2.56     | 0.99    | 1.57       |                                                                             |

**(b)**

| Average annual carbon fluxes (PgC yr <sup>-1</sup> ) |                                                                | TEM_Moss | TEM 5.0 | Difference | Moss NPP/<br><del>Higher</del><br><u>plantVascular</u><br><u>plants</u> NPP |
|------------------------------------------------------|----------------------------------------------------------------|----------|---------|------------|-----------------------------------------------------------------------------|
| NPP                                                  | Moss NPP                                                       | 3.74     | -       | -          | 40.5%                                                                       |
|                                                      | <del>Higher</del><br><u>plantVascular</u><br><u>plants</u> NPP | 9.24     | 11.52   | -          |                                                                             |
|                                                      | Total NPP                                                      | 12.98    | 11.52   | 1.46       |                                                                             |
| $R_H$                                                |                                                                | 10.91    | 11.24   | -0.33      |                                                                             |
| NEP                                                  |                                                                | 2.07     | 0.28    | 1.79       |                                                                             |



**Table 12. Increasing of SOC, vegetation carbon (VGC), and moss carbon (MOSSC) from 1900 to 2000, and total carbon storage during the 21<sup>st</sup> century predicted by two models under (a) RCP 2.6 scenario and (b) RCP 8.5 scenario.**

**(a)**

| Models   | Carbon pools | Carbon pool amounts in 2000/2099 (units: Pg) | Changes in carbon pools during the 21 <sup>st</sup> century (units: Pg) |
|----------|--------------|----------------------------------------------|-------------------------------------------------------------------------|
| TEM_Moss | SOC          | 608.1/692.8                                  | 84.7                                                                    |
|          | VEGC         | 320.2/432.8                                  | 112.6                                                                   |
|          | MOSSC        | 26.2/35.6                                    | 9.4                                                                     |
|          | Total        | 954.5/1161.2                                 | 206.7                                                                   |
| TEM 5.0  | SOC          | 604.4/616.5                                  | 12.1                                                                    |
|          | VEGC         | 318.2/333.7                                  | 15.5                                                                    |
|          | Total        | 922.6/950.2                                  | 27.6                                                                    |

**(b)**

| Models   | Carbon pools | Carbon pool amounts in 2000/2099 (units: Pg) | Changes in carbon pools during the 21 <sup>st</sup> century (units: Pg) |
|----------|--------------|----------------------------------------------|-------------------------------------------------------------------------|
| TEM_Moss | SOC          | 615.9/708.4                                  | 92.5                                                                    |
|          | VEGC         | 327.8/481.4                                  | 153.6                                                                   |
|          | MOSSC        | 28.1/38.2                                    | 10.1                                                                    |
|          | Total        | 971.8/1228.0                                 | 256.2                                                                   |
| TEM 5.0  | SOC          | 610.2/654.4                                  | 44.2                                                                    |
|          | VEGC         | 324.9/379.4                                  | 54.5                                                                    |
|          | Total        | 935.1/1033.8                                 | 98.7                                                                    |
